# Supplementary material for: A draft human pangenome reference
Source: PubMed Central journal article supplement (PMC10172123; doi:10.1038/s41586-023-05896-x), 2023-05-10
Supplement: 41586_2023_5896_MOESM2_ESM.pdf [file 41586_2023_5896_MOESM2_ESM.pdf]

## Reporting Summary

Nature Portfolio wishes to improve the reproducibility of the work that we publish. This form provides structure for consistency and transparency in reporting. For further information on Nature Portfolio policies, see our [Editorial Policies](#) and the [Editorial Policy Checklist](#).

### Statistics

For all statistical analyses, confirm that the following items are present in the figure legend, table legend, main text, or Methods section.

n/a Confirmed

- The exact sample size ( $n$ ) for each experimental group/condition, given as a discrete number and unit of measurement
- A statement on whether measurements were taken from distinct samples or whether the same sample was measured repeatedly
- The statistical test(s) used AND whether they are one- or two-sided  
*Only common tests should be described solely by name; describe more complex techniques in the Methods section.*
- A description of all covariates tested
- A description of any assumptions or corrections, such as tests of normality and adjustment for multiple comparisons
- A full description of the statistical parameters including central tendency (e.g. means) or other basic estimates (e.g. regression coefficient) AND variation (e.g. standard deviation) or associated estimates of uncertainty (e.g. confidence intervals)
- For null hypothesis testing, the test statistic (e.g.  $F$ ,  $t$ ,  $r$ ) with confidence intervals, effect sizes, degrees of freedom and  $P$  value noted  
*Give  $P$  values as exact values whenever suitable.*
- For Bayesian analysis, information on the choice of priors and Markov chain Monte Carlo settings
- For hierarchical and complex designs, identification of the appropriate level for tests and full reporting of outcomes
- Estimates of effect sizes (e.g. Cohen's  $d$ , Pearson's  $r$ ), indicating how they were calculated

*Our web collection on [statistics for biologists](#) contains articles on many of the points above.*

### Software and code

Policy information about [availability of computer code](#)

Data collection

No software was used

Data analysis

|                                      |                  |                                                                                                                                                                         |
|--------------------------------------|------------------|-------------------------------------------------------------------------------------------------------------------------------------------------------------------------|
| abPOA                                |                  | <a href="https://github.com/yangao07/abPOA">https://github.com/yangao07/abPOA</a>                                                                                       |
| ABRA                                 | v2.23            | <a href="https://github.com/mozack/abra">https://github.com/mozack/abra</a>                                                                                             |
| Bandage                              | v0.8.1           | <a href="https://rrwick.github.io/Bandage/">https://rrwick.github.io/Bandage/</a>                                                                                       |
| bcftools                             | v1.16            | <a href="https://samtools.github.io/bcftools/">https://samtools.github.io/bcftools/</a>                                                                                 |
| BEDTools                             | v2.28.0, v2.30.0 | <a href="https://bedtools.readthedocs.io/en/latest/">https://bedtools.readthedocs.io/en/latest/</a>                                                                     |
| Bowtie2                              | v2.4.5           | <a href="https://github.com/BenLangmead/bowtie2">https://github.com/BenLangmead/bowtie2</a>                                                                             |
| BWA-MEM                              | v0.7.17-r1188    | <a href="https://github.com/lh3/bwa">https://github.com/lh3/bwa</a>                                                                                                     |
| Cactus                               | 6cd9a42          | <a href="https://github.com/ComparativeGenomicsToolkit/cactus">https://github.com/ComparativeGenomicsToolkit/cactus</a>                                                 |
| Comparative Annotation Toolkit (CAT) | eb2fc87          | <a href="https://github.com/ComparativeGenomicsToolkit/Comparative-Annotation-Toolkit">https://github.com/ComparativeGenomicsToolkit/Comparative-Annotation-Toolkit</a> |
| danbing-tk                           | v1.3             | <a href="https://github.com/ChaissonLab/danbing-tk">https://github.com/ChaissonLab/danbing-tk</a>                                                                       |
| DeepVariant                          | v1.3.0           | <a href="https://github.com/google/deepvariant">https://github.com/google/deepvariant</a>                                                                               |
| Dfam                                 | v3.3             | <a href="https://www.dfam.org/home">https://www.dfam.org/home</a>                                                                                                       |
| Dipcall                              | v0.3             | <a href="https://github.com/lh3/dipcall">https://github.com/lh3/dipcall</a>                                                                                             |
| dna-brnn                             | v0.1             | <a href="https://github.com/lh3/dna-nn">https://github.com/lh3/dna-nn</a>                                                                                               |
| Exact Tandem Repeat Finder (ETRF)    | fc059d5          | <a href="https://github.com/lh3/etrf">https://github.com/lh3/etrf</a>                                                                                                   |
| Exonerate                            |                  | <a href="https://www.ebi.ac.uk/about/vertebrate-genomics/software/exonerate">https://www.ebi.ac.uk/about/vertebrate-genomics/software/exonerate</a>                     |
| Flagger                              | v0.1             | <a href="https://github.com/mobinasri/flagger">https://github.com/mobinasri/flagger</a>                                                                                 |
| FreeBayes                            | v1.2.0           | <a href="https://github.com/freebayes/freebayes">https://github.com/freebayes/freebayes</a>                                                                             |
| GATK                                 | v3.8.1           | <a href="https://gatk.broadinstitute.org/hc/en-us">https://gatk.broadinstitute.org/hc/en-us</a>                                                                         |

|                                  |                                                                        |                                                                                                                                                                                                                                                                                                                                                       |
|----------------------------------|------------------------------------------------------------------------|-------------------------------------------------------------------------------------------------------------------------------------------------------------------------------------------------------------------------------------------------------------------------------------------------------------------------------------------------------|
| gfabase                          | v0.6.0                                                                 | <a href="https://github.com/mclin/gfabase">https://github.com/mclin/gfabase</a>                                                                                                                                                                                                                                                                       |
| GFAffix                          | v0.1.3                                                                 | <a href="https://github.com/marschall-lab/GFAffix">https://github.com/marschall-lab/GFAffix</a>                                                                                                                                                                                                                                                       |
| GFAtools                         | v0.5                                                                   | <a href="https://github.com/lh3/gfataools">https://github.com/lh3/gfataools</a>                                                                                                                                                                                                                                                                       |
| GffRead                          | v0.12.7                                                                | <a href="https://github.com/gperte/gffread">https://github.com/gperte/gffread</a>                                                                                                                                                                                                                                                                     |
| gggenes                          | v0.4.1                                                                 | <a href="https://github.com/wilkox/gggenes">https://github.com/wilkox/gggenes</a>                                                                                                                                                                                                                                                                     |
| Graph Peak Caller                | v1.2.3                                                                 | <a href="https://github.com/uio-bmi/graph_peak_caller">https://github.com/uio-bmi/graph_peak_caller</a>                                                                                                                                                                                                                                               |
| GraphAligner                     | v1.0.13                                                                | <a href="https://github.com/maickrau/GraphAligner">https://github.com/maickrau/GraphAligner</a>                                                                                                                                                                                                                                                       |
| hal2vg                           |                                                                        | <a href="https://github.com/ComparativeGenomicsToolkit/hal2vg">https://github.com/ComparativeGenomicsToolkit/hal2vg</a>                                                                                                                                                                                                                               |
| Hall-lab pipeline                | 830260a                                                                | <a href="https://github.com/hall-lab/competitive-alignment/blob/master/call_assembly_variants.wdl">https://github.com/hall-lab/competitive-alignment/blob/master/call_assembly_variants.wdl</a>                                                                                                                                                       |
| halLiftover                      |                                                                        | <a href="https://github.com/ComparativeGenomicsToolkit/hal">https://github.com/ComparativeGenomicsToolkit/hal</a>                                                                                                                                                                                                                                     |
| hap.py                           | v3.15                                                                  | <a href="https://github.com/Illumina/hap.py">https://github.com/Illumina/hap.py</a>                                                                                                                                                                                                                                                                   |
| HiFiAdapterFilt                  | 64d1c7b                                                                | <a href="https://github.com/sheinasim/HiFiAdapterFilt">https://github.com/sheinasim/HiFiAdapterFilt</a>                                                                                                                                                                                                                                               |
| hifiasm                          | v0.14, v0.14.1                                                         | <a href="https://github.com/chhylp123/hifiasm">https://github.com/chhylp123/hifiasm</a>                                                                                                                                                                                                                                                               |
| Illumina's Dragen platform       | v3.7.5                                                                 | <a href="https://support.illumina.com/content/dam/illumina-support/help/Illumina_DRAGEN_Bio_IT_Platform_v3_7_1000000141465/Content/In/Informatics/DRAGEN/GraphMapper_FDG.htm">https://support.illumina.com/content/dam/illumina-support/help/Illumina_DRAGEN_Bio_IT_Platform_v3_7_1000000141465/Content/In/Informatics/DRAGEN/GraphMapper_FDG.htm</a> |
| Integrative Genome Browser (IGV) |                                                                        | <a href="https://software.broadinstitute.org/software/igv/">https://software.broadinstitute.org/software/igv/</a>                                                                                                                                                                                                                                     |
| Iris                             | v1.0.4                                                                 | <a href="https://github.com/mkirsche/Iris">https://github.com/mkirsche/Iris</a>                                                                                                                                                                                                                                                                       |
| Liftoff                          | v1.6.3                                                                 | <a href="https://github.com/agshumate/Liftoff">https://github.com/agshumate/Liftoff</a>                                                                                                                                                                                                                                                               |
| MAFFT                            |                                                                        | <a href="https://mafft.cbrc.jp/alignment/software/">https://mafft.cbrc.jp/alignment/software/</a>                                                                                                                                                                                                                                                     |
| Merqury                          | 261b085                                                                | <a href="https://github.com/marbl/merqury">https://github.com/marbl/merqury</a>                                                                                                                                                                                                                                                                       |
| meryl                            | 6d396a0                                                                | <a href="https://github.com/marbl/meryl">https://github.com/marbl/meryl</a>                                                                                                                                                                                                                                                                           |
| Minigraph                        | v0.14, v0.18                                                           | <a href="https://github.com/lh3/minigraph">https://github.com/lh3/minigraph</a>                                                                                                                                                                                                                                                                       |
| minimap2                         | v2.21, v2.1, v2.2.4                                                    | <a href="https://github.com/lh3/minimap2">https://github.com/lh3/minimap2</a>                                                                                                                                                                                                                                                                         |
| NCBI/RMBLAST                     | v2.10.0                                                                | <a href="http://www.repeatmasker.org/rmbblast/">http://www.repeatmasker.org/rmbblast/</a>                                                                                                                                                                                                                                                             |
| odgi pangenome analysis toolkit  |                                                                        | <a href="https://github.com/pangenome/odgi">https://github.com/pangenome/odgi</a>                                                                                                                                                                                                                                                                     |
| panacus                          | 1eeb6d0                                                                | <a href="https://github.com/marschall-lab/panacus">https://github.com/marschall-lab/panacus</a>                                                                                                                                                                                                                                                       |
| PanGenie                         | v1.0.0                                                                 | <a href="https://github.com/eblerjana/pangenie">https://github.com/eblerjana/pangenie</a>                                                                                                                                                                                                                                                             |
| PanGenome Graph Builder (PGGB)   | v0.2.0+531f85f                                                         | <a href="https://github.com/pangenome/pggb">https://github.com/pangenome/pggb</a>                                                                                                                                                                                                                                                                     |
| PAV                              | v0.9.1                                                                 | <a href="https://github.com/EichlerLab/pav">https://github.com/EichlerLab/pav</a>                                                                                                                                                                                                                                                                     |
| PBSV                             | v2.6.2                                                                 | <a href="https://github.com/PacificBiosciences/pbsv">https://github.com/PacificBiosciences/pbsv</a>                                                                                                                                                                                                                                                   |
| Pstools                          | v0.1                                                                   | <a href="https://github.com/shilpagarg/pstools">https://github.com/shilpagarg/pstools</a>                                                                                                                                                                                                                                                             |
| QUAST                            | v5.0.2                                                                 | <a href="https://quast.sourceforge.net/">https://quast.sourceforge.net/</a>                                                                                                                                                                                                                                                                           |
| RepeatMasker                     | v4.1.2-p1                                                              | <a href="https://www.repeatmasker.org/">https://www.repeatmasker.org/</a>                                                                                                                                                                                                                                                                             |
| RPVG                             | 1d91a9e                                                                | <a href="https://github.com/jonassibbesen/rpvG">https://github.com/jonassibbesen/rpvG</a>                                                                                                                                                                                                                                                             |
| RSEM                             | v1.3.3                                                                 | <a href="https://github.com/deweylab/RSEM">https://github.com/deweylab/RSEM</a>                                                                                                                                                                                                                                                                       |
| RTG Tools                        | v3.12.1                                                                | <a href="https://github.com/RealTimeGenomics/rtg-tools">https://github.com/RealTimeGenomics/rtg-tools</a>                                                                                                                                                                                                                                             |
| Salmon                           | v1.9.0                                                                 | <a href="https://github.com/COMBINE-lab/salmon">https://github.com/COMBINE-lab/salmon</a>                                                                                                                                                                                                                                                             |
| Samtools                         | v1.3.1, v1.15                                                          | <a href="https://github.com/samtools/samtools">https://github.com/samtools/samtools</a>                                                                                                                                                                                                                                                               |
| SDUST                            | v0.1                                                                   | <a href="https://github.com/lh3/sdust">https://github.com/lh3/sdust</a>                                                                                                                                                                                                                                                                               |
| Secphase                         | v0.1                                                                   | <a href="https://github.com/mobinasri/secphase">https://github.com/mobinasri/secphase</a>                                                                                                                                                                                                                                                             |
| sedef                            |                                                                        | <a href="https://github.com/vpc-ccg/sedef">https://github.com/vpc-ccg/sedef</a>                                                                                                                                                                                                                                                                       |
| seqtk                            | v1.3                                                                   | <a href="https://github.com/lh3/seqtk">https://github.com/lh3/seqtk</a>                                                                                                                                                                                                                                                                               |
| seqwish                          |                                                                        | <a href="https://github.com/ekg/seqwish">https://github.com/ekg/seqwish</a>                                                                                                                                                                                                                                                                           |
| slivar                           | v0.2.7                                                                 | <a href="https://github.com/brentp/slivar">https://github.com/brentp/slivar</a>                                                                                                                                                                                                                                                                       |
| smoothxg                         |                                                                        | <a href="https://github.com/pangenome/smoothxg">https://github.com/pangenome/smoothxg</a>                                                                                                                                                                                                                                                             |
| Sniffles                         | v1.0.12b                                                               | <a href="https://github.com/fritzsedlazeck/Sniffles">https://github.com/fritzsedlazeck/Sniffles</a>                                                                                                                                                                                                                                                   |
| STAR                             | v2.7.10a                                                               | <a href="https://github.com/alexdobin/STAR">https://github.com/alexdobin/STAR</a>                                                                                                                                                                                                                                                                     |
| SVIM                             | v2.0.0                                                                 | <a href="https://github.com/eldariont/svim">https://github.com/eldariont/svim</a>                                                                                                                                                                                                                                                                     |
| SVIM-asm                         | v1.0.2                                                                 | <a href="https://github.com/eldariont/svim-asm">https://github.com/eldariont/svim-asm</a>                                                                                                                                                                                                                                                             |
| svtools                          |                                                                        | <a href="https://github.com/hall-lab/svtools">https://github.com/hall-lab/svtools</a>                                                                                                                                                                                                                                                                 |
| Tandem Repeat Finder (TRF)       | v4.09                                                                  | <a href="https://tandem.bu.edu/trf/trfdesc.html">https://tandem.bu.edu/trf/trfdesc.html</a>                                                                                                                                                                                                                                                           |
| truvari                          | v3.2.0, v3.1.0                                                         | <a href="https://github.com/ACEnglish/truvari">https://github.com/ACEnglish/truvari</a>                                                                                                                                                                                                                                                               |
| vcfbus                           | v0.1.0                                                                 | <a href="https://github.com/pangenome/vcfbus">https://github.com/pangenome/vcfbus</a>                                                                                                                                                                                                                                                                 |
| vcflib                           |                                                                        | <a href="https://github.com/vcflib/vcflib">https://github.com/vcflib/vcflib</a>                                                                                                                                                                                                                                                                       |
| vg, vg giraffe                   | v1.33.0, v1.36.0, v1.37.0, v1.38.0, v1.39.0, v1.43.0, 2cea1e2, c0c4816 | <a href="https://github.com/vgteam/vg">https://github.com/vgteam/vg</a>                                                                                                                                                                                                                                                                               |
| wfmash                           |                                                                        | <a href="https://github.com/waveygang/wfmash">https://github.com/waveygang/wfmash</a>                                                                                                                                                                                                                                                                 |
| WhatsHap                         | v1.1                                                                   | <a href="https://whatschap.readthedocs.io/en/latest/">https://whatschap.readthedocs.io/en/latest/</a>                                                                                                                                                                                                                                                 |
| winnowmap                        | v2.03                                                                  | <a href="https://github.com/marbl/Winnowmap">https://github.com/marbl/Winnowmap</a>                                                                                                                                                                                                                                                                   |
| Yak                              | v0.1                                                                   | <a href="https://github.com/lh3/yak">https://github.com/lh3/yak</a>                                                                                                                                                                                                                                                                                   |

For manuscripts utilizing custom algorithms or software that are central to the research but not yet described in published literature, software must be made available to editors and reviewers. We strongly encourage code deposition in a community repository (e.g. GitHub). See the Nature Portfolio [guidelines for submitting code & software](#) for further information.

## Data

Policy information about [availability of data](#)

All manuscripts must include a [data availability statement](#). This statement should provide the following information, where applicable:

- Accession codes, unique identifiers, or web links for publicly available datasets
- A description of any restrictions on data availability
- For clinical datasets or third party data, please ensure that the statement adheres to our [policy](#)

Sequencing data, assemblies, and pangenomes produced by the HPRC are available in the AnVIL (<https://anvilproject.org/>) in the AnVIL\_HPRC workspace. Data is also available as part of the AWS Open Data Program (<https://registry.opendata.aws/>) in the human-pangenomics S3 bucket (<https://s3-us-west-2.amazonaws.com/human-pangenomics/index.html>). In addition, data is uploaded to INSDC for long term storage and availability. Supporting information about the data (including

index files with S3 and GCP file locations) can be found in our GitHub repositories (see below).

Sequencing data for 29 selected HPRC samples from the 1KG cohort (Results) are uploaded to BioProject PRJNA701308 (<https://www.ncbi.nlm.nih.gov/bioproject/PRJNA701308/>). Sequencing data created by the HPRC for samples in the cohort of 18 additional samples are uploaded to BioProject PRJNA731524 (<https://www.ncbi.nlm.nih.gov/bioproject/PRJNA731524/>). Both sets of assemblies are grouped by an Umbrella BioProject PRJNA730822. Data used in this paper has additional information available in AnVIL and in our GitHub ([https://github.com/human-pangenomics/HPP\\_Year1\\_Data\\_Freeze\\_v1.0](https://github.com/human-pangenomics/HPP_Year1_Data_Freeze_v1.0)).

Assemblies along with assembly annotations, such as repeat masker and Ensembl gene annotations, can be viewed in an assembly hub in the UCSC Genome Browser (<http://hprc-browser.ucsc.edu/>). The data and annotations can also be accessed through the Ensembl Rapid Release Genome Browser (<https://rapid.ensembl.org>) and a dedicated Ensembl project page for centralized access to HPRC data (<https://projects.ensembl.org/hprc/>), which includes links to download the data locally. File locations for the assemblies (and select annotation files) that are stored in AWS and GCP can also be found in AnVIL or in GitHub ([https://github.com/human-pangenomics/HPP\\_Year1\\_Assemblies](https://github.com/human-pangenomics/HPP_Year1_Assemblies)).

Pangenomes were uploaded to the European Nucleotide Archive as analysis objects and are organized under Umbrella BioProject PRJNA850430 (<https://www.ncbi.nlm.nih.gov/bioproject/PRJNA850430>). File locations for pangenomes, indexes, and variant calls derived from the pangenomes can be found in AnVIL or in our GitHub ([https://github.com/human-pangenomics/hpp\\_pangenome\\_resources](https://github.com/human-pangenomics/hpp_pangenome_resources)).

Variant calls produced by the analysis performed in this paper are available in Amazon S3 ([https://s3-us-west-2.amazonaws.com/human-pangenomics/index.html?prefix=publications/PANGENOME\\_2022/](https://s3-us-west-2.amazonaws.com/human-pangenomics/index.html?prefix=publications/PANGENOME_2022/)) or where indicated in the relevant sections below.

PanGenie genotypes produced for the 1KG samples based on the MC graph are available at: <https://doi.org/10.5281/zenodo.6797328>.

## Human research participants

Policy information about [studies involving human research participants and Sex and Gender in Research](#).

### Reporting on sex and gender

This study used cell lines derived from both male (19) and female (28) donors (47 in total). For 31 samples, we performed whole genome sequencing in this study and for all other samples, sequencing data was taken from other studies referenced in this manuscript. Lymphoblastoid cell lines (LCLs) used for sequencing from the 1000 Genomes Project collection were obtained from the NHGRI Sample Repository for Human Genetic Research and HG002 (GM24385) and HG005 (GM24631) LCLs were obtained from the NIGMS Human Genetic Cell Repository at the Coriell Institute for Medical Research. Therefore, this study is exempt from human subjects research since the proposed work involves the collection or study of data or specimens that are already publicly available.

### Population characteristics

See above

### Recruitment

See above

### Ethics oversight

*Identify the organization(s) that approved the study protocol.*

Note that full information on the approval of the study protocol must also be provided in the manuscript.

## Field-specific reporting

Please select the one below that is the best fit for your research. If you are not sure, read the appropriate sections before making your selection.

Life sciences  Behavioural & social sciences  Ecological, evolutionary & environmental sciences

For a reference copy of the document with all sections, see [nature.com/documents/nr-reporting-summary-flat.pdf](https://www.nature.com/documents/nr-reporting-summary-flat.pdf)

## Life sciences study design

All studies must disclose on these points even when the disclosure is negative.

### Sample size

Decided with respect to HPRC's year1-2 funding

### Data exclusions

Candidates without both parental data, or optimal passage biosamples, were excluded.

### Replication

Experiments were computational so replication is not applicable. For reproducibility all of the data sets and codes/workflows are publicly available. The corresponding links are mentioned in data availability and code availability statements.

### Randomization

The samples were not allocated into different experimental groups.

### Blinding

Blinding is not relevant to this study since the samples in this study were selected solely based on the genetic diversity. Comparison between two or more experimental groups was not the purpose of the study so blinding was not necessary.

## Behavioural & social sciences study design

All studies must disclose on these points even when the disclosure is negative.

|                   |                                                                                                                                                                                                                                                                                                                                                                                                                                                                                 |
|-------------------|---------------------------------------------------------------------------------------------------------------------------------------------------------------------------------------------------------------------------------------------------------------------------------------------------------------------------------------------------------------------------------------------------------------------------------------------------------------------------------|
| Study description | Briefly describe the study type including whether data are quantitative, qualitative, or mixed-methods (e.g. qualitative cross-sectional, quantitative experimental, mixed-methods case study).                                                                                                                                                                                                                                                                                 |
| Research sample   | State the research sample (e.g. Harvard university undergraduates, villagers in rural India) and provide relevant demographic information (e.g. age, sex) and indicate whether the sample is representative. Provide a rationale for the study sample chosen. For studies involving existing datasets, please describe the dataset and source.                                                                                                                                  |
| Sampling strategy | Describe the sampling procedure (e.g. random, snowball, stratified, convenience). Describe the statistical methods that were used to predetermine sample size OR if no sample-size calculation was performed, describe how sample sizes were chosen and provide a rationale for why these sample sizes are sufficient. For qualitative data, please indicate whether data saturation was considered, and what criteria were used to decide that no further sampling was needed. |
| Data collection   | Provide details about the data collection procedure, including the instruments or devices used to record the data (e.g. pen and paper, computer, eye tracker, video or audio equipment) whether anyone was present besides the participant(s) and the researcher, and whether the researcher was blind to experimental condition and/or the study hypothesis during data collection.                                                                                            |
| Timing            | Indicate the start and stop dates of data collection. If there is a gap between collection periods, state the dates for each sample cohort.                                                                                                                                                                                                                                                                                                                                     |
| Data exclusions   | If no data were excluded from the analyses, state so OR if data were excluded, provide the exact number of exclusions and the rationale behind them, indicating whether exclusion criteria were pre-established.                                                                                                                                                                                                                                                                |
| Non-participation | State how many participants dropped out/declined participation and the reason(s) given OR provide response rate OR state that no participants dropped out/declined participation.                                                                                                                                                                                                                                                                                               |
| Randomization     | If participants were not allocated into experimental groups, state so OR describe how participants were allocated to groups, and if allocation was not random, describe how covariates were controlled.                                                                                                                                                                                                                                                                         |

## Ecological, evolutionary & environmental sciences study design

All studies must disclose on these points even when the disclosure is negative.

|                          |                                                                                                                                                                                                                                                                                                                                                                                                                                                         |
|--------------------------|---------------------------------------------------------------------------------------------------------------------------------------------------------------------------------------------------------------------------------------------------------------------------------------------------------------------------------------------------------------------------------------------------------------------------------------------------------|
| Study description        | Briefly describe the study. For quantitative data include treatment factors and interactions, design structure (e.g. factorial, nested, hierarchical), nature and number of experimental units and replicates.                                                                                                                                                                                                                                          |
| Research sample          | Describe the research sample (e.g. a group of tagged <i>Passer domesticus</i> , all <i>Stenocereus thurberi</i> within Organ Pipe Cactus National Monument), and provide a rationale for the sample choice. When relevant, describe the organism taxa, source, sex, age range and any manipulations. State what population the sample is meant to represent when applicable. For studies involving existing datasets, describe the data and its source. |
| Sampling strategy        | Note the sampling procedure. Describe the statistical methods that were used to predetermine sample size OR if no sample-size calculation was performed, describe how sample sizes were chosen and provide a rationale for why these sample sizes are sufficient.                                                                                                                                                                                       |
| Data collection          | Describe the data collection procedure, including who recorded the data and how.                                                                                                                                                                                                                                                                                                                                                                        |
| Timing and spatial scale | Indicate the start and stop dates of data collection, noting the frequency and periodicity of sampling and providing a rationale for these choices. If there is a gap between collection periods, state the dates for each sample cohort. Specify the spatial scale from which the data are taken                                                                                                                                                       |
| Data exclusions          | If no data were excluded from the analyses, state so OR if data were excluded, describe the exclusions and the rationale behind them, indicating whether exclusion criteria were pre-established.                                                                                                                                                                                                                                                       |
| Reproducibility          | Describe the measures taken to verify the reproducibility of experimental findings. For each experiment, note whether any attempts to repeat the experiment failed OR state that all attempts to repeat the experiment were successful.                                                                                                                                                                                                                 |
| Randomization            | Describe how samples/organisms/participants were allocated into groups. If allocation was not random, describe how covariates were controlled. If this is not relevant to your study, explain why.                                                                                                                                                                                                                                                      |
| Blinding                 | Describe the extent of blinding used during data acquisition and analysis. If blinding was not possible, describe why OR explain why blinding was not relevant to your study.                                                                                                                                                                                                                                                                           |

Did the study involve field work?  Yes  No



## Field work, collection and transport

|                        |                                                                                                                                                                                                                                                                                                                                       |
|------------------------|---------------------------------------------------------------------------------------------------------------------------------------------------------------------------------------------------------------------------------------------------------------------------------------------------------------------------------------|
| Field conditions       | <i>Describe the study conditions for field work, providing relevant parameters (e.g. temperature, rainfall).</i>                                                                                                                                                                                                                      |
| Location               | <i>State the location of the sampling or experiment, providing relevant parameters (e.g. latitude and longitude, elevation, water depth).</i>                                                                                                                                                                                         |
| Access & import/export | <i>Describe the efforts you have made to access habitats and to collect and import/export your samples in a responsible manner and in compliance with local, national and international laws, noting any permits that were obtained (give the name of the issuing authority, the date of issue, and any identifying information).</i> |
| Disturbance            | <i>Describe any disturbance caused by the study and how it was minimized.</i>                                                                                                                                                                                                                                                         |

## Reporting for specific materials, systems and methods

We require information from authors about some types of materials, experimental systems and methods used in many studies. Here, indicate whether each material, system or method listed is relevant to your study. If you are not sure if a list item applies to your research, read the appropriate section before selecting a response.

### Materials & experimental systems

|                                     |                                                           |
|-------------------------------------|-----------------------------------------------------------|
| n/a                                 | Included in the study                                     |
| <input checked="" type="checkbox"/> | <input type="checkbox"/> Antibodies                       |
| <input type="checkbox"/>            | <input checked="" type="checkbox"/> Eukaryotic cell lines |
| <input checked="" type="checkbox"/> | <input type="checkbox"/> Palaeontology and archaeology    |
| <input checked="" type="checkbox"/> | <input type="checkbox"/> Animals and other organisms      |
| <input checked="" type="checkbox"/> | <input type="checkbox"/> Clinical data                    |
| <input checked="" type="checkbox"/> | <input type="checkbox"/> Dual use research of concern     |

### Methods

|                                     |                                                 |
|-------------------------------------|-------------------------------------------------|
| n/a                                 | Included in the study                           |
| <input type="checkbox"/>            | <input checked="" type="checkbox"/> ChIP-seq    |
| <input checked="" type="checkbox"/> | <input type="checkbox"/> Flow cytometry         |
| <input checked="" type="checkbox"/> | <input type="checkbox"/> MRI-based neuroimaging |

## Antibodies

|                 |                                                                                                                                                                                                                                                         |
|-----------------|---------------------------------------------------------------------------------------------------------------------------------------------------------------------------------------------------------------------------------------------------------|
| Antibodies used | <i>Describe all antibodies used in the study; as applicable, provide supplier name, catalog number, clone name, and lot number.</i>                                                                                                                     |
| Validation      | <i>Describe the validation of each primary antibody for the species and application, noting any validation statements on the manufacturer's website, relevant citations, antibody profiles in online databases, or data provided in the manuscript.</i> |

## Eukaryotic cell lines

Policy information about [cell lines and Sex and Gender in Research](#)

|                     |                                                                                                                                                                                                                                                                                                                                                                                                                                                                                                                                                                                                                                                                                                                                                                                                                                                                              |
|---------------------|------------------------------------------------------------------------------------------------------------------------------------------------------------------------------------------------------------------------------------------------------------------------------------------------------------------------------------------------------------------------------------------------------------------------------------------------------------------------------------------------------------------------------------------------------------------------------------------------------------------------------------------------------------------------------------------------------------------------------------------------------------------------------------------------------------------------------------------------------------------------------|
| Cell line source(s) | <p>Lymphoblastoid cell lines used for sequencing from the 1KG collection were obtained from the NHGRI Sample Repository for Human Genetic Research at the Coriell Institute for Medical Research.<br/>HG002 (GM24385) and HG005 (GM24631) lymphoblastoid cell lines were obtained from the NIGMS Human Genetic Cell Repository at the Coriell Institute for Medical Research.</p> <p>Sample Cohort Sex<br/>-----<br/>HG01123 HPRC female<br/>HG01258 HPRC male<br/>HG01358 HPRC male<br/>HG01361 HPRC female<br/>HG01891 HPRC female<br/>HG02257 HPRC female<br/>HG02486 HPRC male<br/>HG02559 HPRC female<br/>HG02572 HPRC male<br/>HG03516 HPRC female<br/>HG00438 HPRC female<br/>HG00621 HPRC male<br/>HG00673 HPRC male<br/>HG00735 HPRC female<br/>HG00741 HPRC female<br/>HG01071 HPRC female<br/>HG01106 HPRC male<br/>HG01175 HPRC female<br/>HG01928 HPRC male</p> |
|---------------------|------------------------------------------------------------------------------------------------------------------------------------------------------------------------------------------------------------------------------------------------------------------------------------------------------------------------------------------------------------------------------------------------------------------------------------------------------------------------------------------------------------------------------------------------------------------------------------------------------------------------------------------------------------------------------------------------------------------------------------------------------------------------------------------------------------------------------------------------------------------------------|

HG01952 HPRC male  
 HG01978 HPRC female  
 HG02148 HPRC female  
 HG02622 HPRC female  
 HG02630 HPRC female  
 HG02717 HPRC male  
 HG02886 HPRC female  
 HG03453 HPRC female  
 HG03540 HPRC female  
 HG03579 HPRC male  
 HG002 HPRC\_PLUS male  
 HG005 HPRC\_PLUS male

Authentication

This study involved the use of authenticated cell lines that are publicly available from the NHGRI Sample Repository for Human Genetic Research and the NIGMS Human Genetic Cell Repository at the Coriell Institute for Medical Research. Cell line identity was confirmed using a multiplex PCR assay for six autosomal microsatellite markers.

Mycoplasma contamination

All cell lines tested negative for mycoplasma contamination.

Commonly misidentified lines  
 (See [ICLAC](#) register)

No misidentified cell line was used in this study.

## Palaeontology and Archaeology

Specimen provenance

*Provide provenance information for specimens and describe permits that were obtained for the work (including the name of the issuing authority, the date of issue, and any identifying information). Permits should encompass collection and, where applicable, export.*

Specimen deposition

*Indicate where the specimens have been deposited to permit free access by other researchers.*

Dating methods

*If new dates are provided, describe how they were obtained (e.g. collection, storage, sample pretreatment and measurement), where they were obtained (i.e. lab name), the calibration program and the protocol for quality assurance OR state that no new dates are provided.*

Tick this box to confirm that the raw and calibrated dates are available in the paper or in Supplementary Information.

Ethics oversight

*Identify the organization(s) that approved or provided guidance on the study protocol, OR state that no ethical approval or guidance was required and explain why not.*

Note that full information on the approval of the study protocol must also be provided in the manuscript.

## Animals and other research organisms

Policy information about [studies involving animals](#); [ARRIVE guidelines](#) recommended for reporting animal research, and [Sex and Gender in Research](#)

Laboratory animals

*For laboratory animals, report species, strain and age OR state that the study did not involve laboratory animals.*

Wild animals

*Provide details on animals observed in or captured in the field; report species and age where possible. Describe how animals were caught and transported and what happened to captive animals after the study (if killed, explain why and describe method; if released, say where and when) OR state that the study did not involve wild animals.*

Reporting on sex

*Indicate if findings apply to only one sex; describe whether sex was considered in study design, methods used for assigning sex. Provide data disaggregated for sex where this information has been collected in the source data as appropriate; provide overall numbers in this Reporting Summary. Please state if this information has not been collected. Report sex-based analyses where performed, justify reasons for lack of sex-based analysis.*

Field-collected samples

*For laboratory work with field-collected samples, describe all relevant parameters such as housing, maintenance, temperature, photoperiod and end-of-experiment protocol OR state that the study did not involve samples collected from the field.*

Ethics oversight

*Identify the organization(s) that approved or provided guidance on the study protocol, OR state that no ethical approval or guidance was required and explain why not.*

Note that full information on the approval of the study protocol must also be provided in the manuscript.

## Clinical data

Policy information about [clinical studies](#)

All manuscripts should comply with the ICMJE [guidelines for publication of clinical research](#) and a completed [CONSORT checklist](#) must be included with all submissions.

Clinical trial registration

*Provide the trial registration number from [ClinicalTrials.gov](#) or an equivalent agency.*

|                 |                                                                                                                          |
|-----------------|--------------------------------------------------------------------------------------------------------------------------|
| Study protocol  | <i>Note where the full trial protocol can be accessed OR if not available, explain why.</i>                              |
| Data collection | <i>Describe the settings and locales of data collection, noting the time periods of recruitment and data collection.</i> |
| Outcomes        | <i>Describe how you pre-defined primary and secondary outcome measures and how you assessed these measures.</i>          |

## Dual use research of concern

Policy information about [dual use research of concern](#)

### Hazards

Could the accidental, deliberate or reckless misuse of agents or technologies generated in the work, or the application of information presented in the manuscript, pose a threat to:

| No                                  | Yes                      |                            |
|-------------------------------------|--------------------------|----------------------------|
| <input checked="" type="checkbox"/> | <input type="checkbox"/> | Public health              |
| <input checked="" type="checkbox"/> | <input type="checkbox"/> | National security          |
| <input checked="" type="checkbox"/> | <input type="checkbox"/> | Crops and/or livestock     |
| <input checked="" type="checkbox"/> | <input type="checkbox"/> | Ecosystems                 |
| <input checked="" type="checkbox"/> | <input type="checkbox"/> | Any other significant area |

### Experiments of concern

Does the work involve any of these experiments of concern:

| No                                  | Yes                      |                                                                             |
|-------------------------------------|--------------------------|-----------------------------------------------------------------------------|
| <input checked="" type="checkbox"/> | <input type="checkbox"/> | Demonstrate how to render a vaccine ineffective                             |
| <input checked="" type="checkbox"/> | <input type="checkbox"/> | Confer resistance to therapeutically useful antibiotics or antiviral agents |
| <input checked="" type="checkbox"/> | <input type="checkbox"/> | Enhance the virulence of a pathogen or render a nonpathogen virulent        |
| <input checked="" type="checkbox"/> | <input type="checkbox"/> | Increase transmissibility of a pathogen                                     |
| <input checked="" type="checkbox"/> | <input type="checkbox"/> | Alter the host range of a pathogen                                          |
| <input checked="" type="checkbox"/> | <input type="checkbox"/> | Enable evasion of diagnostic/detection modalities                           |
| <input checked="" type="checkbox"/> | <input type="checkbox"/> | Enable the weaponization of a biological agent or toxin                     |
| <input checked="" type="checkbox"/> | <input type="checkbox"/> | Any other potentially harmful combination of experiments and agents         |

## ChIP-seq

### Data deposition

- Confirm that both raw and final processed data have been deposited in a public database such as [GEO](#).
- Confirm that you have deposited or provided access to graph files (e.g. BED files) for the called peaks.

Data access links   
*May remain private before publication.*

Files in database submission

```
Rscripts/
Rscripts/allele_support.R
Rscripts/peak_replication.R
peaks/
peaks/h3k4me1_ref_peaks/
peaks/atac_overlaps/
peaks/do.sh
peaks/h3k4me1_hprc_peaks/
peaks/counts.csv
peaks/atac_hprc_peaks/
peaks/subtract_peaks.sh
peaks/atac_ref_peaks/
peaks/h3k27ac_ref_peaks/
peaks/h3k27ac_hprc_peaks/
peaks/h3k4me1_overlaps/
peaks/h3k27ac_overlaps/
peaks/h3k27ac_overlaps/EU21_Flu_2-571406_ChIPmentation-
H3K27ac_A00266_0263_3_S24_L003_I_peaks.narrowPeak_ref-only.bed
peaks/h3k27ac_overlaps/AF34_Flu_2-571349_ChIPmentation-
H3K27ac_A00266_0263_3_S17_L003_I_peaks.narrowPeak_pers-only.bed
```

peaks/h3k27ac\_overlaps/AF20\_Flu\_2-571333\_ChIPmentation-H3K27ac\_A00266\_0263\_3\_S1\_L003\_I\_peaks.narrowPeak\_ref-only.bed  
peaks/h3k27ac\_overlaps/AF20\_Flu\_2-571333\_ChIPmentation-H3K27ac\_A00266\_0263\_3\_S1\_L003\_I\_peaks.narrowPeak\_pers-only.bed  
peaks/h3k27ac\_overlaps/EU05\_Flu\_2-571412\_ChIPmentation-H3K27ac\_A00266\_0265\_2\_S6\_L002\_I\_peaks.narrowPeak\_pers-only.bed  
peaks/h3k27ac\_overlaps/EU13\_Flu\_2-571348\_ChIPmentation-H3K27ac\_A00266\_0263\_3\_S16\_L003\_I\_peaks.narrowPeak\_ref-only.bed  
peaks/h3k27ac\_overlaps/AF08\_Flu\_2-571405\_ChIPmentation-H3K27ac\_A00266\_0263\_3\_S23\_L003\_I\_peaks.narrowPeak\_intersect.bed  
peaks/h3k27ac\_overlaps/EU19\_Flu\_2-571338\_ChIPmentation-H3K27ac\_A00266\_0263\_3\_S6\_L003\_I\_peaks.narrowPeak\_pers-only.bed  
peaks/h3k27ac\_overlaps/AF04\_Flu\_2-642070\_ChIPmentation-H3K27ac\_A00266\_0265\_2\_S14\_L002\_I\_peaks.narrowPeak\_ref-only.bed  
peaks/h3k27ac\_overlaps/EU27\_Flu\_2-642077\_ChIPmentation-H3K27ac\_A00266\_0265\_2\_S21\_L002\_I\_peaks.narrowPeak\_intersect.bed  
peaks/h3k27ac\_overlaps/EU39\_Flu\_2-571401\_ChIPmentation-H3K27ac\_A00266\_0263\_3\_S19\_L003\_I\_peaks.narrowPeak\_ref-only.bed  
peaks/h3k27ac\_overlaps/AF30\_Flu\_2-669476\_ChIPmentation-H3K27ac\_A00266\_0289\_1\_S12\_L001\_I\_peaks.narrowPeak\_intersect.bed  
peaks/h3k27ac\_overlaps/EU07\_Flu\_2-642067\_ChIPmentation-H3K27ac\_A00266\_0265\_2\_S11\_L002\_I\_peaks.narrowPeak\_ref-only.bed  
peaks/h3k27ac\_overlaps/EU15\_Flu\_2-571342\_ChIPmentation-H3K27ac\_A00266\_0263\_3\_S10\_L003\_I\_peaks.narrowPeak\_intersect.bed  
peaks/h3k27ac\_overlaps/EU13\_Flu\_2-571348\_ChIPmentation-H3K27ac\_A00266\_0263\_3\_S16\_L003\_I\_peaks.narrowPeak\_intersect.bed  
peaks/h3k27ac\_overlaps/AF12\_Flu\_2-571340\_ChIPmentation-H3K27ac\_A00266\_0263\_3\_S8\_L003\_I\_peaks.narrowPeak\_pers-only.bed  
peaks/h3k27ac\_overlaps/AF36\_Flu\_2-571346\_ChIPmentation-H3K27ac\_A00266\_0263\_3\_S14\_L003\_I\_peaks.narrowPeak\_intersect.bed  
peaks/h3k27ac\_overlaps/AF04\_Flu\_2-642070\_ChIPmentation-H3K27ac\_A00266\_0265\_2\_S14\_L002\_I\_peaks.narrowPeak\_pers-only.bed  
peaks/h3k27ac\_overlaps/AF22\_Flu\_2-669473\_ChIPmentation-H3K27ac\_A00266\_0289\_1\_S9\_L001\_I\_peaks.narrowPeak\_pers-only.bed  
peaks/h3k27ac\_overlaps/EU47\_Flu\_2-669480\_ChIPmentation-H3K27ac\_A00266\_0289\_1\_S16\_L001\_I\_peaks.narrowPeak\_pers-only.bed  
peaks/h3k27ac\_overlaps/AF34\_Flu\_2-571349\_ChIPmentation-H3K27ac\_A00266\_0263\_3\_S17\_L003\_I\_peaks.narrowPeak\_ref-only.bed  
peaks/h3k27ac\_overlaps/EU03\_Flu\_2-571411\_ChIPmentation-H3K27ac\_A00266\_0265\_2\_S5\_L002\_I\_peaks.narrowPeak\_ref-only.bed  
peaks/h3k27ac\_overlaps/EU21\_Flu\_2-571406\_ChIPmentation-H3K27ac\_A00266\_0263\_3\_S24\_L003\_I\_peaks.narrowPeak\_intersect.bed  
peaks/h3k27ac\_overlaps/EU21\_Flu\_2-571406\_ChIPmentation-H3K27ac\_A00266\_0263\_3\_S24\_L003\_I\_peaks.narrowPeak\_pers-only.bed  
peaks/h3k27ac\_overlaps/AF22\_Flu\_2-669473\_ChIPmentation-H3K27ac\_A00266\_0289\_1\_S9\_L001\_I\_peaks.narrowPeak\_intersect.bed  
peaks/h3k27ac\_overlaps/EU47\_Flu\_2-669480\_ChIPmentation-H3K27ac\_A00266\_0289\_1\_S16\_L001\_I\_peaks.narrowPeak\_intersect.bed  
peaks/h3k27ac\_overlaps/AF04\_Flu\_2-642070\_ChIPmentation-H3K27ac\_A00266\_0265\_2\_S14\_L002\_I\_peaks.narrowPeak\_intersect.bed  
peaks/h3k27ac\_overlaps/AF36\_Flu\_2-571346\_ChIPmentation-H3K27ac\_A00266\_0263\_3\_S14\_L003\_I\_peaks.narrowPeak\_pers-only.bed  
peaks/h3k27ac\_overlaps/AF12\_Flu\_2-571340\_ChIPmentation-H3K27ac\_A00266\_0263\_3\_S8\_L003\_I\_peaks.narrowPeak\_intersect.bed  
peaks/h3k27ac\_overlaps/AF18\_Flu\_2-642068\_ChIPmentation-H3K27ac\_A00266\_0265\_2\_S12\_L002\_I\_peaks.narrowPeak\_ref-only.bed  
peaks/h3k27ac\_overlaps/EU19\_Flu\_2-571338\_ChIPmentation-H3K27ac\_A00266\_0263\_3\_S6\_L003\_I\_peaks.narrowPeak\_ref-only.bed  
peaks/h3k27ac\_overlaps/EU13\_Flu\_2-571348\_ChIPmentation-H3K27ac\_A00266\_0263\_3\_S16\_L003\_I\_peaks.narrowPeak\_pers-only.bed  
peaks/h3k27ac\_overlaps/EU15\_Flu\_2-571342\_ChIPmentation-H3K27ac\_A00266\_0263\_3\_S10\_L003\_I\_peaks.narrowPeak\_pers-only.bed  
peaks/h3k27ac\_overlaps/AF30\_Flu\_2-669476\_ChIPmentation-H3K27ac\_A00266\_0289\_1\_S12\_L001\_I\_peaks.narrowPeak\_pers-only.bed  
peaks/h3k27ac\_overlaps/EU27\_Flu\_2-642077\_ChIPmentation-H3K27ac\_A00266\_0265\_2\_S21\_L002\_I\_peaks.narrowPeak\_pers-only.bed  
peaks/h3k27ac\_overlaps/EU19\_Flu\_2-571338\_ChIPmentation-H3K27ac\_A00266\_0263\_3\_S6\_L003\_I\_peaks.narrowPeak\_intersect.bed  
peaks/h3k27ac\_overlaps/AF08\_Flu\_2-571405\_ChIPmentation-H3K27ac\_A00266\_0263\_3\_S23\_L003\_I\_peaks.narrowPeak\_pers-only.bed  
peaks/h3k27ac\_overlaps/EU33\_Flu\_2-669466\_ChIPmentation-H3K27ac\_A00266\_0289\_1\_S2\_L001\_I\_peaks.narrowPeak\_ref-only.bed  
peaks/h3k27ac\_overlaps/AF30\_Flu\_2-669476\_ChIPmentation-H3K27ac\_A00266\_0289\_1\_S12\_L001\_I\_peaks.narrowPeak\_ref-only.bed  
peaks/h3k27ac\_overlaps/EU05\_Flu\_2-571412\_ChIPmentation-H3K27ac\_A00266\_0265\_2\_S6\_L002\_I\_peaks.narrowPeak\_intersect.bed

peaks/h3k27ac\_overlaps/AF20\_Flu\_2-571333\_ChIPmentation-H3K27ac\_A00266\_0263\_3\_S1\_L003\_I\_peaks.narrowPeak\_intersect.bed  
peaks/h3k27ac\_overlaps/AF34\_Flu\_2-571349\_ChIPmentation-H3K27ac\_A00266\_0263\_3\_S17\_L003\_I\_peaks.narrowPeak\_intersect.bed  
peaks/h3k27ac\_overlaps/EU39\_Flu\_2-571401\_ChIPmentation-H3K27ac\_A00266\_0263\_3\_S19\_L003\_I\_peaks.narrowPeak\_intersect.bed  
peaks/h3k27ac\_overlaps/EU03\_Flu\_2-571411\_ChIPmentation-H3K27ac\_A00266\_0265\_2\_S5\_L002\_I\_peaks.narrowPeak\_pers-only.bed  
peaks/h3k27ac\_overlaps/AF24\_Flu\_2-642069\_ChIPmentation-H3K27ac\_A00266\_0265\_2\_S13\_L002\_I\_peaks.narrowPeak\_intersect.bed  
peaks/h3k27ac\_overlaps/EU15\_Flu\_2-571342\_ChIPmentation-H3K27ac\_A00266\_0263\_3\_S10\_L003\_I\_peaks.narrowPeak\_ref-only.bed  
peaks/h3k27ac\_overlaps/AF12\_Flu\_2-571340\_ChIPmentation-H3K27ac\_A00266\_0263\_3\_S8\_L003\_I\_peaks.narrowPeak\_ref-only.bed  
peaks/h3k27ac\_overlaps/AF26\_Flu\_2-571344\_ChIPmentation-H3K27ac\_A00266\_0263\_3\_S12\_L003\_I\_peaks.narrowPeak\_intersect.bed  
peaks/h3k27ac\_overlaps/EU33\_Flu\_2-669466\_ChIPmentation-H3K27ac\_A00266\_0289\_1\_S2\_L001\_I\_peaks.narrowPeak\_pers-only.bed  
peaks/h3k27ac\_overlaps/EU07\_Flu\_2-642067\_ChIPmentation-H3K27ac\_A00266\_0265\_2\_S11\_L002\_I\_peaks.narrowPeak\_pers-only.bed  
peaks/h3k27ac\_overlaps/EU25\_Flu\_2-571343\_ChIPmentation-H3K27ac\_A00266\_0263\_3\_S11\_L003\_I\_peaks.narrowPeak\_pers-only.bed  
peaks/h3k27ac\_overlaps/EU41\_Flu\_2-669478\_ChIPmentation-H3K27ac\_A00266\_0289\_1\_S14\_L001\_I\_peaks.narrowPeak\_intersect.bed  
peaks/h3k27ac\_overlaps/AF38\_Flu\_2-669483\_ChIPmentation-H3K27ac\_A00266\_0289\_1\_S19\_L001\_I\_peaks.narrowPeak\_intersect.bed  
peaks/h3k27ac\_overlaps/AF18\_Flu\_2-642068\_ChIPmentation-H3K27ac\_A00266\_0265\_2\_S12\_L002\_I\_peaks.narrowPeak\_intersect.bed  
peaks/h3k27ac\_overlaps/AF08\_Flu\_2-571405\_ChIPmentation-H3K27ac\_A00266\_0263\_3\_S23\_L003\_I\_peaks.narrowPeak\_ref-only.bed  
peaks/h3k27ac\_overlaps/EU09\_Flu\_2-571335\_ChIPmentation-H3K27ac\_A00266\_0263\_3\_S3\_L003\_I\_peaks.narrowPeak\_intersect.bed  
peaks/h3k27ac\_overlaps/EU29\_Flu\_2-669467\_ChIPmentation-H3K27ac\_A00266\_0289\_1\_S3\_L001\_I\_peaks.narrowPeak\_ref-only.bed  
peaks/h3k27ac\_overlaps/AF06\_Flu\_2-642071\_ChIPmentation-H3K27ac\_A00266\_0265\_2\_S15\_L002\_I\_peaks.narrowPeak\_intersect.bed  
peaks/h3k27ac\_overlaps/EU29\_Flu\_2-669467\_ChIPmentation-H3K27ac\_A00266\_0289\_1\_S3\_L001\_I\_peaks.narrowPeak\_intersect.bed  
peaks/h3k27ac\_overlaps/AF16\_Flu\_2-571407\_ChIPmentation-H3K27ac\_A00266\_0265\_2\_S1\_L002\_I\_peaks.narrowPeak\_intersect.bed  
peaks/h3k27ac\_overlaps/EU41\_Flu\_2-669478\_ChIPmentation-H3K27ac\_A00266\_0289\_1\_S14\_L001\_I\_peaks.narrowPeak\_ref-only.bed  
peaks/h3k27ac\_overlaps/AF28\_Flu\_2-571345\_ChIPmentation-H3K27ac\_A00266\_0263\_3\_S13\_L003\_I\_peaks.narrowPeak\_intersect.bed  
peaks/h3k27ac\_overlaps/AF28\_Flu\_2-571345\_ChIPmentation-H3K27ac\_A00266\_0263\_3\_S13\_L003\_I\_peaks.narrowPeak\_pers-only.bed  
peaks/h3k27ac\_overlaps/EU09\_Flu\_2-571335\_ChIPmentation-H3K27ac\_A00266\_0263\_3\_S3\_L003\_I\_peaks.narrowPeak\_ref-only.bed  
peaks/h3k27ac\_overlaps/AF16\_Flu\_2-571407\_ChIPmentation-H3K27ac\_A00266\_0265\_2\_S1\_L002\_I\_peaks.narrowPeak\_pers-only.bed  
peaks/h3k27ac\_overlaps/EU27\_Flu\_2-642077\_ChIPmentation-H3K27ac\_A00266\_0265\_2\_S21\_L002\_I\_peaks.narrowPeak\_ref-only.bed  
peaks/h3k27ac\_overlaps/EU25\_Flu\_2-571343\_ChIPmentation-H3K27ac\_A00266\_0263\_3\_S11\_L003\_I\_peaks.narrowPeak\_ref-only.bed  
peaks/h3k27ac\_overlaps/AF22\_Flu\_2-669473\_ChIPmentation-H3K27ac\_A00266\_0289\_1\_S9\_L001\_I\_peaks.narrowPeak\_ref-only.bed  
peaks/h3k27ac\_overlaps/AF24\_Flu\_2-642069\_ChIPmentation-H3K27ac\_A00266\_0265\_2\_S13\_L002\_I\_peaks.narrowPeak\_ref-only.bed  
peaks/h3k27ac\_overlaps/EU05\_Flu\_2-571412\_ChIPmentation-H3K27ac\_A00266\_0265\_2\_S6\_L002\_I\_peaks.narrowPeak\_ref-only.bed  
peaks/h3k27ac\_overlaps/AF36\_Flu\_2-571346\_ChIPmentation-H3K27ac\_A00266\_0263\_3\_S14\_L003\_I\_peaks.narrowPeak\_ref-only.bed  
peaks/h3k27ac\_overlaps/EU29\_Flu\_2-669467\_ChIPmentation-H3K27ac\_A00266\_0289\_1\_S3\_L001\_I\_peaks.narrowPeak\_pers-only.bed  
peaks/h3k27ac\_overlaps/AF06\_Flu\_2-642071\_ChIPmentation-H3K27ac\_A00266\_0265\_2\_S15\_L002\_I\_peaks.narrowPeak\_ref-only.bed  
peaks/h3k27ac\_overlaps/EU09\_Flu\_2-571335\_ChIPmentation-H3K27ac\_A00266\_0263\_3\_S3\_L003\_I\_peaks.narrowPeak\_pers-only.bed  
peaks/h3k27ac\_overlaps/AF06\_Flu\_2-642071\_ChIPmentation-H3K27ac\_A00266\_0265\_2\_S15\_L002\_I\_peaks.narrowPeak\_pers-only.bed  
peaks/h3k27ac\_overlaps/EU47\_Flu\_2-669480\_ChIPmentation-H3K27ac\_A00266\_0289\_1\_S16\_L001\_I\_peaks.narrowPeak\_ref-only.bed  
peaks/h3k27ac\_overlaps/AF38\_Flu\_2-669483\_ChIPmentation-H3K27ac\_A00266\_0289\_1\_S19\_L001\_I\_peaks.narrowPeak\_ref-only.bed  
peaks/h3k27ac\_overlaps/AF18\_Flu\_2-642068\_ChIPmentation-H3K27ac\_A00266\_0265\_2\_S12\_L002\_I\_peaks.narrowPeak\_pers-only.bed

peaks/h3k27ac\_overlaps/AF26\_Flu\_2-571344\_ChIPmentation-H3K27ac\_A00266\_0263\_3\_S12\_L003\_I\_peaks.narrowPeak\_ref-only.bed  
peaks/h3k27ac\_overlaps/AF38\_Flu\_2-669483\_ChIPmentation-H3K27ac\_A00266\_0289\_1\_S19\_L001\_I\_peaks.narrowPeak\_pers-only.bed  
peaks/h3k27ac\_overlaps/EU25\_Flu\_2-571343\_ChIPmentation-H3K27ac\_A00266\_0263\_3\_S11\_L003\_I\_peaks.narrowPeak\_intersect.bed  
peaks/h3k27ac\_overlaps/EU41\_Flu\_2-669478\_ChIPmentation-H3K27ac\_A00266\_0289\_1\_S14\_L001\_I\_peaks.narrowPeak\_pers-only.bed  
peaks/h3k27ac\_overlaps/EU33\_Flu\_2-669466\_ChIPmentation-H3K27ac\_A00266\_0289\_1\_S2\_L001\_I\_peaks.narrowPeak\_intersect.bed  
peaks/h3k27ac\_overlaps/EU07\_Flu\_2-642067\_ChIPmentation-H3K27ac\_A00266\_0265\_2\_S11\_L002\_I\_peaks.narrowPeak\_intersect.bed  
peaks/h3k27ac\_overlaps/AF16\_Flu\_2-571407\_ChIPmentation-H3K27ac\_A00266\_0265\_2\_S1\_L002\_I\_peaks.narrowPeak\_ref-only.bed  
peaks/h3k27ac\_overlaps/AF28\_Flu\_2-571345\_ChIPmentation-H3K27ac\_A00266\_0263\_3\_S13\_L003\_I\_peaks.narrowPeak\_ref-only.bed  
peaks/h3k27ac\_overlaps/AF26\_Flu\_2-571344\_ChIPmentation-H3K27ac\_A00266\_0263\_3\_S12\_L003\_I\_peaks.narrowPeak\_pers-only.bed  
peaks/h3k27ac\_overlaps/EU03\_Flu\_2-571411\_ChIPmentation-H3K27ac\_A00266\_0265\_2\_S5\_L002\_I\_peaks.narrowPeak\_intersect.bed  
peaks/h3k27ac\_overlaps/AF24\_Flu\_2-642069\_ChIPmentation-H3K27ac\_A00266\_0265\_2\_S13\_L002\_I\_peaks.narrowPeak\_pers-only.bed  
peaks/h3k27ac\_overlaps/EU39\_Flu\_2-571401\_ChIPmentation-H3K27ac\_A00266\_0263\_3\_S19\_L003\_I\_peaks.narrowPeak\_pers-only.bed  
peaks/h3k4me1\_overlaps/AF38\_Flu\_2-674837\_ChIPmentation-H3K4me1\_A00266\_0301\_2\_S14\_L002\_I\_peaks.narrowPeak\_ref-only.bed  
peaks/h3k4me1\_overlaps/AF36\_Flu\_2-669593\_ChIPmentation-H3K4me1\_A00266\_0289\_2\_S10\_L002\_I\_peaks.narrowPeak\_intersect.bed  
peaks/h3k4me1\_overlaps/AF24\_Flu\_2-674804\_ChIPmentation-H3K4me1\_A00266\_0301\_1\_S5\_L001\_I\_peaks.narrowPeak\_intersect.bed  
peaks/h3k4me1\_overlaps/AF20\_Flu\_2-669580\_ChIPmentation-H3K4me1\_A00266\_0289\_1\_S21\_L001\_I\_peaks.narrowPeak\_ref-only.bed  
peaks/h3k4me1\_overlaps/AF18\_Flu\_2-674803\_ChIPmentation-H3K4me1\_A00266\_0301\_1\_S4\_L001\_I\_peaks.narrowPeak\_ref-only.bed  
peaks/h3k4me1\_overlaps/AF30\_Flu\_2-674830\_ChIPmentation-H3K4me1\_A00266\_0301\_2\_S7\_L002\_I\_peaks.narrowPeak\_pers-only.bed  
peaks/h3k4me1\_overlaps/AF06\_Flu\_2-674806\_ChIPmentation-H3K4me1\_A00266\_0301\_1\_S7\_L001\_I\_peaks.narrowPeak\_ref-only.bed  
peaks/h3k4me1\_overlaps/AF16\_Flu\_2-669654\_ChIPmentation-H3K4me1\_A00266\_0289\_2\_S21\_L002\_I\_peaks.narrowPeak\_pers-only.bed  
peaks/h3k4me1\_overlaps/EU13\_Flu\_2-669595\_ChIPmentation-H3K4me1A00266\_0289\_2\_S12\_L002\_I\_peaks.narrowPeak\_pers-only.bed  
peaks/h3k4me1\_overlaps/EU29\_Flu\_2-674821\_ChIPmentation-H3K4me1A00266\_0301\_1\_S22\_L001\_I\_peaks.narrowPeak\_intersect.bed  
peaks/h3k4me1\_overlaps/EU27\_Flu\_2-674815\_ChIPmentation-H3K4me1A00266\_0301\_1\_S16\_L001\_I\_peaks.narrowPeak\_ref-only.bed  
peaks/h3k4me1\_overlaps/EU09\_Flu\_2-669582\_ChIPmentation-H3K4me1A00266\_0289\_1\_S23\_L001\_I\_peaks.narrowPeak\_intersect.bed  
peaks/h3k4me1\_overlaps/AF28\_Flu\_2-669592\_ChIPmentation-H3K4me1\_A00266\_0289\_2\_S9\_L002\_I\_peaks.narrowPeak\_pers-only.bed  
peaks/h3k4me1\_overlaps/AF12\_Flu\_2-669587\_ChIPmentation-H3K4me1\_A00266\_0289\_2\_S4\_L002\_I\_peaks.narrowPeak\_intersect.bed  
peaks/h3k4me1\_overlaps/EU25\_Flu\_2-669590\_ChIPmentation-H3K4me1A00266\_0289\_2\_S7\_L002\_I\_peaks.narrowPeak\_pers-only.bed  
peaks/h3k4me1\_overlaps/AF18\_Flu\_2-674803\_ChIPmentation-H3K4me1\_A00266\_0301\_1\_S4\_L001\_I\_peaks.narrowPeak\_pers-only.bed  
peaks/h3k4me1\_overlaps/AF22\_Flu\_2-674827\_ChIPmentation-H3K4me1\_A00266\_0301\_2\_S4\_L002\_I\_peaks.narrowPeak\_ref-only.bed  
peaks/h3k4me1\_overlaps/EU13\_Flu\_2-669595\_ChIPmentation-H3K4me1A00266\_0289\_2\_S12\_L002\_I\_peaks.narrowPeak\_ref-only.bed  
peaks/h3k4me1\_overlaps/EU33\_Flu\_2-674820\_ChIPmentation-H3K4me1A00266\_0301\_1\_S21\_L001\_I\_peaks.narrowPeak\_pers-only.bed  
peaks/h3k4me1\_overlaps/AF26\_Flu\_2-669591\_ChIPmentation-H3K4me1\_A00266\_0289\_2\_S8\_L002\_I\_peaks.narrowPeak\_ref-only.bed  
peaks/h3k4me1\_overlaps/EU27\_Flu\_2-674815\_ChIPmentation-H3K4me1A00266\_0301\_1\_S16\_L001\_I\_peaks.narrowPeak\_intersect.bed  
peaks/h3k4me1\_overlaps/EU07\_Flu\_2-674802\_ChIPmentation-H3K4me1A00266\_0301\_1\_S3\_L001\_I\_peaks.narrowPeak\_pers-only.bed  
peaks/h3k4me1\_overlaps/AF34\_Flu\_2-669596\_ChIPmentation-H3K4me1\_A00266\_0289\_2\_S13\_L002\_I\_peaks.narrowPeak\_intersect.bed  
peaks/h3k4me1\_overlaps/AF04\_Flu\_2-674805\_ChIPmentation-H3K4me1\_A00266\_0301\_1\_S6\_L001\_I\_peaks.narrowPeak\_ref-only.bed  
peaks/h3k4me1\_overlaps/AF38\_Flu\_2-674837\_ChIPmentation-H3K4me1\_A00266\_0301\_2\_S14\_L002\_I\_peaks.narrowPeak\_intersect.bed  
peaks/h3k4me1\_overlaps/EU05\_Flu\_2-674801\_ChIPmentation-H3K4me1A00266\_0301\_1\_S2\_L001\_I\_peaks.narrowPeak\_pers-only.bed



peaks/h3k4me1\_overlaps/EU41\_Flu\_2-674832\_ChIPmentation-H3K4me1A00266\_0301\_2\_S9\_L002\_I\_peaks.narrowPeak\_pers-only.bed  
peaks/h3k4me1\_overlaps/AF36\_Flu\_2-669593\_ChIPmentation-H3K4me1\_A00266\_0289\_2\_S10\_L002\_I\_peaks.narrowPeak\_ref-only.bed  
peaks/h3k4me1\_overlaps/EU39\_Flu\_2-669598\_ChIPmentation-H3K4me1A00266\_0289\_2\_S15\_L002\_I\_peaks.narrowPeak\_intersect.bed  
peaks/h3k4me1\_overlaps/EU39\_Flu\_2-669598\_ChIPmentation-H3K4me1A00266\_0289\_2\_S15\_L002\_I\_peaks.narrowPeak\_pers-only.bed  
peaks/h3k4me1\_overlaps/EU03\_Flu\_2-674750\_ChIPmentation-H3K4me1A00266\_0301\_1\_S1\_L001\_I\_peaks.narrowPeak\_ref-only.bed  
peaks/h3k4me1\_overlaps/EU29\_Flu\_2-674821\_ChIPmentation-H3K4me1A00266\_0301\_1\_S22\_L001\_I\_peaks.narrowPeak\_ref-only.bed  
peaks/h3k4me1\_overlaps/EU41\_Flu\_2-674832\_ChIPmentation-H3K4me1A00266\_0301\_2\_S9\_L002\_I\_peaks.narrowPeak\_intersect.bed  
peaks/h3k4me1\_overlaps/EU05\_Flu\_2-674801\_ChIPmentation-H3K4me1A00266\_0301\_1\_S2\_L001\_I\_peaks.narrowPeak\_intersect.bed  
peaks/h3k4me1\_overlaps/AF38\_Flu\_2-674837\_ChIPmentation-H3K4me1\_A00266\_0301\_2\_S14\_L002\_I\_peaks.narrowPeak\_pers-only.bed  
peaks/h3k4me1\_overlaps/AF08\_Flu\_2-669652\_ChIPmentation-H3K4me1\_A00266\_0289\_2\_S19\_L002\_I\_peaks.narrowPeak\_ref-only.bed  
peaks/h3k4me1\_overlaps/AF34\_Flu\_2-669596\_ChIPmentation-H3K4me1\_A00266\_0289\_2\_S13\_L002\_I\_peaks.narrowPeak\_pers-only.bed  
peaks/h3k4me1\_overlaps/EU15\_Flu\_2-669589\_ChIPmentation-H3K4me1A00266\_0289\_2\_S6\_L002\_I\_peaks.narrowPeak\_ref-only.bed  
peaks/h3k4me1\_overlaps/EU27\_Flu\_2-674815\_ChIPmentation-H3K4me1A00266\_0301\_1\_S16\_L001\_I\_peaks.narrowPeak\_pers-only.bed  
peaks/h3k4me1\_overlaps/EU07\_Flu\_2-674802\_ChIPmentation-H3K4me1A00266\_0301\_1\_S3\_L001\_I\_peaks.narrowPeak\_intersect.bed  
peaks/h3k4me1\_overlaps/EU47\_Flu\_2-674834\_ChIPmentation-H3K4me1A00266\_0301\_2\_S11\_L002\_I\_peaks.narrowPeak\_ref-only.bed  
peaks/h3k4me1\_overlaps/AF34\_Flu\_2-669596\_ChIPmentation-H3K4me1\_A00266\_0289\_2\_S13\_L002\_I\_peaks.narrowPeak\_ref-only.bed  
peaks/h3k4me1\_overlaps/EU33\_Flu\_2-674820\_ChIPmentation-H3K4me1A00266\_0301\_1\_S21\_L001\_I\_peaks.narrowPeak\_intersect.bed  
peaks/h3k4me1\_overlaps/AF18\_Flu\_2-674803\_ChIPmentation-H3K4me1\_A00266\_0301\_1\_S4\_L001\_I\_peaks.narrowPeak\_intersect.bed  
peaks/h3k4me1\_overlaps/EU25\_Flu\_2-669590\_ChIPmentation-H3K4me1A00266\_0289\_2\_S7\_L002\_I\_peaks.narrowPeak\_intersect.bed  
peaks/h3k4me1\_overlaps/AF12\_Flu\_2-669587\_ChIPmentation-H3K4me1\_A00266\_0289\_2\_S4\_L002\_I\_peaks.narrowPeak\_pers-only.bed  
peaks/h3k4me1\_overlaps/AF28\_Flu\_2-669592\_ChIPmentation-H3K4me1\_A00266\_0289\_2\_S9\_L002\_I\_peaks.narrowPeak\_intersect.bed  
peaks/h3k4me1\_overlaps/EU33\_Flu\_2-674820\_ChIPmentation-H3K4me1A00266\_0301\_1\_S21\_L001\_I\_peaks.narrowPeak\_ref-only.bed  
peaks/h3k4me1\_overlaps/EU09\_Flu\_2-669582\_ChIPmentation-H3K4me1A00266\_0289\_1\_S23\_L001\_I\_peaks.narrowPeak\_pers-only.bed  
peaks/h3k4me1\_overlaps/AF16\_Flu\_2-669654\_ChIPmentation-H3K4me1\_A00266\_0289\_2\_S21\_L002\_I\_peaks.narrowPeak\_intersect.bed  
peaks/h3k4me1\_overlaps/EU13\_Flu\_2-669595\_ChIPmentation-H3K4me1A00266\_0289\_2\_S12\_L002\_I\_peaks.narrowPeak\_intersect.bed  
peaks/h3k4me1\_overlaps/EU29\_Flu\_2-674821\_ChIPmentation-H3K4me1A00266\_0301\_1\_S22\_L001\_I\_peaks.narrowPeak\_pers-only.bed  
peaks/h3k4me1\_overlaps/EU19\_Flu\_2-669585\_ChIPmentation-H3K4me1A00266\_0289\_2\_S2\_L002\_I\_peaks.narrowPeak\_ref-only.bed  
peaks/h3k4me1\_overlaps/AF30\_Flu\_2-674830\_ChIPmentation-H3K4me1\_A00266\_0301\_2\_S7\_L002\_I\_peaks.narrowPeak\_intersect.bed  
peaks/h3k4me1\_overlaps/AF24\_Flu\_2-674804\_ChIPmentation-H3K4me1\_A00266\_0301\_1\_S5\_L001\_I\_peaks.narrowPeak\_pers-only.bed  
peaks/h3k4me1\_overlaps/AF36\_Flu\_2-669593\_ChIPmentation-H3K4me1\_A00266\_0289\_2\_S10\_L002\_I\_peaks.narrowPeak\_pers-only.bed  
peaks/h3k4me1\_overlaps/AF08\_Flu\_2-669652\_ChIPmentation-H3K4me1\_A00266\_0289\_2\_S19\_L002\_I\_peaks.narrowPeak\_intersect.bed  
peaks/h3k4me1\_overlaps/AF26\_Flu\_2-669591\_ChIPmentation-H3K4me1\_A00266\_0289\_2\_S8\_L002\_I\_peaks.narrowPeak\_pers-only.bed  
peaks/h3k4me1\_overlaps/AF22\_Flu\_2-674827\_ChIPmentation-H3K4me1\_A00266\_0301\_2\_S4\_L002\_I\_peaks.narrowPeak\_pers-only.bed  
peaks/h3k4me1\_overlaps/EU15\_Flu\_2-669589\_ChIPmentation-H3K4me1A00266\_0289\_2\_S6\_L002\_I\_peaks.narrowPeak\_pers-only.bed  
peaks/h3k4me1\_overlaps/EU19\_Flu\_2-669585\_ChIPmentation-H3K4me1A00266\_0289\_2\_S2\_L002\_I\_peaks.narrowPeak\_intersect.bed  
peaks/h3k4me1\_overlaps/EU39\_Flu\_2-669598\_ChIPmentation-H3K4me1A00266\_0289\_2\_S15\_L002\_I\_peaks.narrowPeak\_ref-only.bed  
peaks/h3k4me1\_overlaps/EU21\_Flu\_2-669653\_ChIPmentation-H3K4me1A00266\_0289\_2\_S20\_L002\_I\_peaks.narrowPeak\_intersect.bed  
peaks/h3k4me1\_overlaps/AF12\_Flu\_2-669587\_ChIPmentation-H3K4me1\_A00266\_0289\_2\_S4\_L002\_I\_peaks.narrowPeak\_ref-only.bed

peaks/h3k4me1\_overlaps/AF06\_Flu\_2-674806\_ChIPmentation-H3K4me1\_A00266\_0301\_1\_S7\_L001\_I\_peaks.narrowPeak\_intersect.bed  
 peaks/h3k4me1\_overlaps/AF20\_Flu\_2-669580\_ChIPmentation-H3K4me1\_A00266\_0289\_1\_S21\_L001\_I\_peaks.narrowPeak\_pers-only.bed  
 peaks/h3k4me1\_overlaps/AF04\_Flu\_2-674805\_ChIPmentation-H3K4me1\_A00266\_0301\_1\_S6\_L001\_I\_peaks.narrowPeak\_pers-only.bed  
 peaks/h3k4me1\_overlaps/EU05\_Flu\_2-674801\_ChIPmentation-H3K4me1A00266\_0301\_1\_S2\_L001\_I\_peaks.narrowPeak\_ref-only.bed  
 peaks/h3k4me1\_overlaps/AF16\_Flu\_2-669654\_ChIPmentation-H3K4me1\_A00266\_0289\_2\_S21\_L002\_I\_peaks.narrowPeak\_ref-only.bed  
 peaks/h3k4me1\_overlaps/EU03\_Flu\_2-674750\_ChIPmentation-H3K4me1A00266\_0301\_1\_S1\_L001\_I\_peaks.narrowPeak\_intersect.bed  
 peaks/h3k4me1\_overlaps/EU47\_Flu\_2-674834\_ChIPmentation-H3K4me1A00266\_0301\_2\_S11\_L002\_I\_peaks.narrowPeak\_pers-only.bed  
 peaks/h3k4me1\_overlaps/EU41\_Flu\_2-674832\_ChIPmentation-H3K4me1A00266\_0301\_2\_S9\_L002\_I\_peaks.narrowPeak\_ref-only.bed  
 peaks/h3k4me1\_overlaps/AF30\_Flu\_2-674830\_ChIPmentation-H3K4me1\_A00266\_0301\_2\_S7\_L002\_I\_peaks.narrowPeak\_ref-only.bed  
 peaks/h3k4me1\_overlaps/EU47\_Flu\_2-674834\_ChIPmentation-H3K4me1A00266\_0301\_2\_S11\_L002\_I\_peaks.narrowPeak\_intersect.bed  
 peaks/h3k4me1\_overlaps/EU25\_Flu\_2-669590\_ChIPmentation-H3K4me1A00266\_0289\_2\_S7\_L002\_I\_peaks.narrowPeak\_ref-only.bed  
 peaks/h3k4me1\_overlaps/EU03\_Flu\_2-674750\_ChIPmentation-H3K4me1A00266\_0301\_1\_S1\_L001\_I\_peaks.narrowPeak\_pers-only.bed  
 peaks/h3k4me1\_overlaps/AF24\_Flu\_2-674804\_ChIPmentation-H3K4me1\_A00266\_0301\_1\_S5\_L001\_I\_peaks.narrowPeak\_ref-only.bed  
 peaks/h3k4me1\_overlaps/AF04\_Flu\_2-674805\_ChIPmentation-H3K4me1\_A00266\_0301\_1\_S6\_L001\_I\_peaks.narrowPeak\_intersect.bed  
 peaks/h3k4me1\_overlaps/AF20\_Flu\_2-669580\_ChIPmentation-H3K4me1\_A00266\_0289\_1\_S21\_L001\_I\_peaks.narrowPeak\_intersect.bed  
 peaks/h3k4me1\_overlaps/EU07\_Flu\_2-674802\_ChIPmentation-H3K4me1A00266\_0301\_1\_S3\_L001\_I\_peaks.narrowPeak\_ref-only.bed  
 peaks/h3k4me1\_overlaps/AF06\_Flu\_2-674806\_ChIPmentation-H3K4me1\_A00266\_0301\_1\_S7\_L001\_I\_peaks.narrowPeak\_pers-only.bed  
 peaks/h3k4me1\_overlaps/EU21\_Flu\_2-669653\_ChIPmentation-H3K4me1A00266\_0289\_2\_S20\_L002\_I\_peaks.narrowPeak\_pers-only.bed  
 peaks/h3k4me1\_overlaps/EU19\_Flu\_2-669585\_ChIPmentation-H3K4me1A00266\_0289\_2\_S2\_L002\_I\_peaks.narrowPeak\_pers-only.bed  
 peaks/h3k4me1\_overlaps/EU21\_Flu\_2-669653\_ChIPmentation-H3K4me1A00266\_0289\_2\_S20\_L002\_I\_peaks.narrowPeak\_ref-only.bed  
 peaks/h3k4me1\_overlaps/EU15\_Flu\_2-669589\_ChIPmentation-H3K4me1A00266\_0289\_2\_S6\_L002\_I\_peaks.narrowPeak\_intersect.bed  
 peaks/h3k4me1\_overlaps/AF28\_Flu\_2-669592\_ChIPmentation-H3K4me1\_A00266\_0289\_2\_S9\_L002\_I\_peaks.narrowPeak\_ref-only.bed  
 peaks/h3k4me1\_overlaps/AF22\_Flu\_2-674827\_ChIPmentation-H3K4me1\_A00266\_0301\_2\_S4\_L002\_I\_peaks.narrowPeak\_intersect.bed  
 peaks/h3k4me1\_overlaps/EU09\_Flu\_2-669582\_ChIPmentation-H3K4me1A00266\_0289\_1\_S23\_L001\_I\_peaks.narrowPeak\_ref-only.bed  
 peaks/h3k4me1\_overlaps/AF26\_Flu\_2-669591\_ChIPmentation-H3K4me1\_A00266\_0289\_2\_S8\_L002\_I\_peaks.narrowPeak\_intersect.bed  
 peaks/h3k4me1\_overlaps/AF08\_Flu\_2-669652\_ChIPmentation-H3K4me1\_A00266\_0289\_2\_S19\_L002\_I\_peaks.narrowPeak\_pers-only.bed  
 peaks/h3k27ac\_hprc\_peaks/AF24\_Flu\_2-642069\_ChIPmentation-H3K27ac\_A00266\_0265\_2\_S13\_L002\_I\_peaks.narrowPeak  
 peaks/h3k27ac\_hprc\_peaks/AF18\_Flu\_2-642068\_ChIPmentation-H3K27ac\_A00266\_0265\_2\_S12\_L002\_I\_peaks.narrowPeak  
 peaks/h3k27ac\_hprc\_peaks/EU05\_Flu\_2-571412\_ChIPmentation-H3K27ac\_A00266\_0265\_2\_S6\_L002\_I\_peaks.narrowPeak  
 peaks/h3k27ac\_hprc\_peaks/AF22\_Flu\_2-669473\_ChIPmentation-H3K27ac\_A00266\_0289\_1\_S9\_L001\_I\_peaks.narrowPeak  
 peaks/h3k27ac\_hprc\_peaks/EU47\_Flu\_2-669480\_ChIPmentation-H3K27ac\_A00266\_0289\_1\_S16\_L001\_I\_peaks.narrowPeak  
 peaks/h3k27ac\_hprc\_peaks/EU19\_Flu\_2-571338\_ChIPmentation-H3K27ac\_A00266\_0263\_3\_S6\_L003\_I\_peaks.narrowPeak  
 peaks/h3k27ac\_hprc\_peaks/AF30\_Flu\_2-669476\_ChIPmentation-H3K27ac\_A00266\_0289\_1\_S12\_L001\_I\_peaks.narrowPeak  
 peaks/h3k27ac\_hprc\_peaks/EU09\_Flu\_2-571335\_ChIPmentation-H3K27ac\_A00266\_0263\_3\_S3\_L003\_I\_peaks.narrowPeak  
 peaks/h3k27ac\_hprc\_peaks/AF26\_Flu\_2-571344\_ChIPmentation-H3K27ac\_A00266\_0263\_3\_S12\_L003\_I\_peaks.narrowPeak  
 peaks/h3k27ac\_hprc\_peaks/EU33\_Flu\_2-669466\_ChIPmentation-H3K27ac\_A00266\_0289\_1\_S2\_L001\_I\_peaks.narrowPeak  
 peaks/h3k27ac\_hprc\_peaks/EU25\_Flu\_2-571343\_ChIPmentation-H3K27ac\_A00266\_0263\_3\_S11\_L003\_I\_peaks.narrowPeak  
 peaks/h3k27ac\_hprc\_peaks/AF38\_Flu\_2-669483\_ChIPmentation-H3K27ac\_A00266\_0289\_1\_S19\_L001\_I\_peaks.narrowPeak  
 peaks/h3k27ac\_hprc\_peaks/EU21\_Flu\_2-571406\_ChIPmentation-H3K27ac\_A00266\_0263\_3\_S24\_L003\_I\_peaks.narrowPeak  
 peaks/h3k27ac\_hprc\_peaks/AF06\_Flu\_2-642071\_ChIPmentation-H3K27ac\_A00266\_0265\_2\_S15\_L002\_I\_peaks.narrowPeak  
 peaks/h3k27ac\_hprc\_peaks/EU15\_Flu\_2-571342\_ChIPmentation-H3K27ac\_A00266\_0263\_3\_S10\_L003\_I\_peaks.narrowPeak  
 peaks/h3k27ac\_hprc\_peaks/AF16\_Flu\_2-571407\_ChIPmentation-H3K27ac\_A00266\_0265\_2\_S1\_L002\_I\_peaks.narrowPeak  
 peaks/h3k27ac\_hprc\_peaks/AF08\_Flu\_2-571405\_ChIPmentation-H3K27ac\_A00266\_0263\_3\_S23\_L003\_I\_peaks.narrowPeak  
 peaks/h3k27ac\_hprc\_peaks/EU13\_Flu\_2-571348\_ChIPmentation-H3K27ac\_A00266\_0263\_3\_S16\_L003\_I\_peaks.narrowPeak  
 peaks/h3k27ac\_hprc\_peaks/AF36\_Flu\_2-571346\_ChIPmentation-H3K27ac\_A00266\_0263\_3\_S14\_L003\_I\_peaks.narrowPeak  
 peaks/h3k27ac\_hprc\_peaks/AF34\_Flu\_2-571349\_ChIPmentation-H3K27ac\_A00266\_0263\_3\_S17\_L003\_I\_peaks.narrowPeak  
 peaks/h3k27ac\_hprc\_peaks/AF12\_Flu\_2-571340\_ChIPmentation-H3K27ac\_A00266\_0263\_3\_S8\_L003\_I\_peaks.narrowPeak  
 peaks/h3k27ac\_hprc\_peaks/EU03\_Flu\_2-571411\_ChIPmentation-H3K27ac\_A00266\_0265\_2\_S5\_L002\_I\_peaks.narrowPeak  
 peaks/h3k27ac\_hprc\_peaks/EU41\_Flu\_2-669478\_ChIPmentation-H3K27ac\_A00266\_0289\_1\_S14\_L001\_I\_peaks.narrowPeak  
 peaks/h3k27ac\_hprc\_peaks/AF20\_Flu\_2-571333\_ChIPmentation-H3K27ac\_A00266\_0263\_3\_S1\_L003\_I\_peaks.narrowPeak

peaks/h3k27ac\_hprc\_peaks/EU29\_Flu\_2-669467\_Chipmentation-H3K27ac\_A00266\_0289\_1\_S3\_L001\_I\_peaks.narrowPeak  
peaks/h3k27ac\_hprc\_peaks/AF04\_Flu\_2-642070\_Chipmentation-H3K27ac\_A00266\_0265\_2\_S14\_L002\_I\_peaks.narrowPeak  
peaks/h3k27ac\_hprc\_peaks/EU39\_Flu\_2-571401\_Chipmentation-H3K27ac\_A00266\_0263\_3\_S19\_L003\_I\_peaks.narrowPeak  
peaks/h3k27ac\_hprc\_peaks/AF28\_Flu\_2-571345\_Chipmentation-H3K27ac\_A00266\_0263\_3\_S13\_L003\_I\_peaks.narrowPeak  
peaks/h3k27ac\_hprc\_peaks/EU07\_Flu\_2-642067\_Chipmentation-H3K27ac\_A00266\_0265\_2\_S11\_L002\_I\_peaks.narrowPeak  
peaks/h3k27ac\_hprc\_peaks/EU27\_Flu\_2-642077\_Chipmentation-H3K27ac\_A00266\_0265\_2\_S21\_L002\_I\_peaks.narrowPeak  
peaks/h3k27ac\_ref\_peaks/AF24\_Flu\_2-642069\_Chipmentation-H3K27ac\_A00266\_0265\_2\_S13\_L002\_I\_peaks.narrowPeak  
peaks/h3k27ac\_ref\_peaks/AF18\_Flu\_2-642068\_Chipmentation-H3K27ac\_A00266\_0265\_2\_S12\_L002\_I\_peaks.narrowPeak  
peaks/h3k27ac\_ref\_peaks/EU05\_Flu\_2-571412\_Chipmentation-H3K27ac\_A00266\_0265\_2\_S6\_L002\_I\_peaks.narrowPeak  
peaks/h3k27ac\_ref\_peaks/AF22\_Flu\_2-669473\_Chipmentation-H3K27ac\_A00266\_0289\_1\_S9\_L001\_I\_peaks.narrowPeak  
peaks/h3k27ac\_ref\_peaks/EU47\_Flu\_2-669480\_Chipmentation-H3K27ac\_A00266\_0289\_1\_S16\_L001\_I\_peaks.narrowPeak  
peaks/h3k27ac\_ref\_peaks/EU19\_Flu\_2-571338\_Chipmentation-H3K27ac\_A00266\_0263\_3\_S6\_L003\_I\_peaks.narrowPeak  
peaks/h3k27ac\_ref\_peaks/AF30\_Flu\_2-669476\_Chipmentation-H3K27ac\_A00266\_0289\_1\_S12\_L001\_I\_peaks.narrowPeak  
peaks/h3k27ac\_ref\_peaks/EU09\_Flu\_2-571335\_Chipmentation-H3K27ac\_A00266\_0263\_3\_S3\_L003\_I\_peaks.narrowPeak  
peaks/h3k27ac\_ref\_peaks/AF26\_Flu\_2-571344\_Chipmentation-H3K27ac\_A00266\_0263\_3\_S12\_L003\_I\_peaks.narrowPeak  
peaks/h3k27ac\_ref\_peaks/EU33\_Flu\_2-669466\_Chipmentation-H3K27ac\_A00266\_0289\_1\_S2\_L001\_I\_peaks.narrowPeak  
peaks/h3k27ac\_ref\_peaks/EU25\_Flu\_2-571343\_Chipmentation-H3K27ac\_A00266\_0263\_3\_S11\_L003\_I\_peaks.narrowPeak  
peaks/h3k27ac\_ref\_peaks/AF38\_Flu\_2-669483\_Chipmentation-H3K27ac\_A00266\_0289\_1\_S19\_L001\_I\_peaks.narrowPeak  
peaks/h3k27ac\_ref\_peaks/EU21\_Flu\_2-571406\_Chipmentation-H3K27ac\_A00266\_0263\_3\_S24\_L003\_I\_peaks.narrowPeak  
peaks/h3k27ac\_ref\_peaks/AF06\_Flu\_2-642071\_Chipmentation-H3K27ac\_A00266\_0265\_2\_S15\_L002\_I\_peaks.narrowPeak  
peaks/h3k27ac\_ref\_peaks/EU15\_Flu\_2-571342\_Chipmentation-H3K27ac\_A00266\_0263\_3\_S10\_L003\_I\_peaks.narrowPeak  
peaks/h3k27ac\_ref\_peaks/AF16\_Flu\_2-571407\_Chipmentation-H3K27ac\_A00266\_0265\_2\_S1\_L002\_I\_peaks.narrowPeak  
peaks/h3k27ac\_ref\_peaks/AF08\_Flu\_2-571405\_Chipmentation-H3K27ac\_A00266\_0263\_3\_S23\_L003\_I\_peaks.narrowPeak  
peaks/h3k27ac\_ref\_peaks/EU13\_Flu\_2-571348\_Chipmentation-H3K27ac\_A00266\_0263\_3\_S16\_L003\_I\_peaks.narrowPeak  
peaks/h3k27ac\_ref\_peaks/AF36\_Flu\_2-571346\_Chipmentation-H3K27ac\_A00266\_0263\_3\_S15\_L002\_I\_peaks.narrowPeak  
peaks/h3k27ac\_ref\_peaks/AF34\_Flu\_2-571349\_Chipmentation-H3K27ac\_A00266\_0263\_3\_S17\_L003\_I\_peaks.narrowPeak  
peaks/h3k27ac\_ref\_peaks/AF12\_Flu\_2-571340\_Chipmentation-H3K27ac\_A00266\_0263\_3\_S8\_L003\_I\_peaks.narrowPeak  
peaks/h3k27ac\_ref\_peaks/EU03\_Flu\_2-571411\_Chipmentation-H3K27ac\_A00266\_0265\_2\_S5\_L002\_I\_peaks.narrowPeak  
peaks/h3k27ac\_ref\_peaks/EU41\_Flu\_2-669478\_Chipmentation-H3K27ac\_A00266\_0289\_1\_S14\_L001\_I\_peaks.narrowPeak  
peaks/h3k27ac\_ref\_peaks/AF20\_Flu\_2-571333\_Chipmentation-H3K27ac\_A00266\_0265\_2\_S1\_L003\_I\_peaks.narrowPeak  
peaks/h3k27ac\_ref\_peaks/EU29\_Flu\_2-669467\_Chipmentation-H3K27ac\_A00266\_0289\_1\_S3\_L001\_I\_peaks.narrowPeak  
peaks/h3k27ac\_ref\_peaks/AF04\_Flu\_2-642070\_Chipmentation-H3K27ac\_A00266\_0265\_2\_S14\_L002\_I\_peaks.narrowPeak  
peaks/h3k27ac\_ref\_peaks/EU39\_Flu\_2-571401\_Chipmentation-H3K27ac\_A00266\_0263\_3\_S19\_L003\_I\_peaks.narrowPeak  
peaks/h3k27ac\_ref\_peaks/AF28\_Flu\_2-571345\_Chipmentation-H3K27ac\_A00266\_0263\_3\_S13\_L003\_I\_peaks.narrowPeak  
peaks/h3k27ac\_ref\_peaks/EU07\_Flu\_2-642067\_Chipmentation-H3K27ac\_A00266\_0265\_2\_S11\_L002\_I\_peaks.narrowPeak  
peaks/h3k27ac\_ref\_peaks/EU27\_Flu\_2-642077\_Chipmentation-H3K27ac\_A00266\_0265\_2\_S21\_L002\_I\_peaks.narrowPeak  
peaks/atac\_ref\_peaks/EU29\_Flu\_ATACSeq\_1\_2-268563\_S10\_L001\_I\_peaks.narrowPeak  
peaks/atac\_ref\_peaks/EU09\_Flu\_ATACSeq\_1\_2-259471\_S11\_L001\_I\_peaks.narrowPeak  
peaks/atac\_ref\_peaks/EU13\_Flu\_ATACSeq\_1\_2-259477\_S1\_L002\_I\_peaks.narrowPeak  
peaks/atac\_ref\_peaks/EU05\_Flu\_ATACSeq\_1\_2-259464\_S4\_L001\_I\_peaks.narrowPeak  
peaks/atac\_ref\_peaks/AF10\_Flu\_ATACSeq\_1\_2-259491\_S15\_L002\_I\_peaks.narrowPeak  
peaks/atac\_ref\_peaks/EU19\_Flu\_ATACSeq\_1\_2-259485\_S9\_L002\_I\_peaks.narrowPeak  
peaks/atac\_ref\_peaks/AF22\_Flu\_ATACSeq\_1\_2-308160\_S3\_L001\_I\_peaks.narrowPeak  
peaks/atac\_ref\_peaks/AF14\_Flu\_ATACSeq\_1\_2-268556\_S3\_L001\_I\_peaks.narrowPeak  
peaks/atac\_ref\_peaks/EU33\_Flu\_ATACSeq\_1\_2-308170\_S13\_L001\_I\_peaks.narrowPeak  
peaks/atac\_ref\_peaks/EU37\_Flu\_ATACSeq\_1\_2-308172\_S15\_L001\_I\_peaks.narrowPeak  
peaks/atac\_ref\_peaks/AF18\_Flu\_ATACSeq\_1\_2-268567\_S14\_L001\_I\_peaks.narrowPeak  
peaks/atac\_ref\_peaks/EU47\_Flu\_ATACSeq\_1\_2-308183\_S10\_L002\_I\_peaks.narrowPeak  
peaks/atac\_ref\_peaks/EU27\_Flu\_ATACSeq\_1\_2-268561\_S8\_L001\_I\_peaks.narrowPeak  
peaks/atac\_ref\_peaks/AF26\_Flu\_ATACSeq\_1\_2-308164\_S7\_L001\_I\_peaks.narrowPeak  
peaks/atac\_ref\_peaks/EU43\_Flu\_ATACSeq\_1\_2-308181\_S8\_L002\_I\_peaks.narrowPeak  
peaks/atac\_ref\_peaks/EU21\_Flu\_ATACSeq\_1\_2-259488\_S12\_L002\_I\_peaks.narrowPeak  
peaks/atac\_ref\_peaks/AF34\_Flu\_ATACSeq\_1\_2-308174\_S17\_L001\_I\_peaks.narrowPeak  
peaks/atac\_ref\_peaks/AF28\_Flu\_ATACSeq\_1\_2-308166\_S9\_L001\_I\_peaks.narrowPeak  
peaks/atac\_ref\_peaks/EU07\_Flu\_ATACSeq\_1\_2-259468\_S8\_L001\_I\_peaks.narrowPeak  
peaks/atac\_ref\_peaks/EU41\_Flu\_ATACSeq\_1\_2-308179\_S6\_L002\_I\_peaks.narrowPeak  
peaks/atac\_ref\_peaks/EU03\_Flu\_ATACSeq\_1\_2-259462\_S2\_L001\_I\_peaks.narrowPeak  
peaks/atac\_ref\_peaks/EU17\_Flu\_ATACSeq\_1\_2-308175\_S2\_L002\_I\_peaks.narrowPeak  
peaks/atac\_ref\_peaks/AF16\_Flu\_ATACSeq\_1\_2-268565\_S12\_L001\_I\_peaks.narrowPeak  
peaks/atac\_ref\_peaks/AF20\_Flu\_ATACSeq\_1\_2-308158\_S1\_L001\_I\_peaks.narrowPeak  
peaks/atac\_ref\_peaks/EU25\_Flu\_ATACSeq\_1\_2-268559\_S6\_L001\_I\_peaks.narrowPeak  
peaks/atac\_ref\_peaks/EU15\_Flu\_ATACSeq\_1\_2-259481\_S5\_L002\_I\_peaks.narrowPeak  
peaks/atac\_ref\_peaks/EU39\_Flu\_ATACSeq\_1\_2-308177\_S4\_L002\_I\_peaks.narrowPeak  
peaks/atac\_ref\_peaks/AF04\_Flu\_ATACSeq\_1\_2-259466\_S6\_L001\_I\_peaks.narrowPeak  
peaks/atac\_ref\_peaks/AF08\_Flu\_ATACSeq\_1\_2-259483\_S7\_L002\_I\_peaks.narrowPeak  
peaks/atac\_ref\_peaks/AF12\_Flu\_ATACSeq\_1\_2-268554\_S1\_L001\_I\_peaks.narrowPeak  
peaks/atac\_ref\_peaks/AF06\_Flu\_ATACSeq\_1\_2-259479\_S3\_L002\_I\_peaks.narrowPeak  
peaks/atac\_ref\_peaks/AF38\_Flu\_ATACSeq\_1\_2-308187\_S14\_L002\_I\_peaks.narrowPeak  
peaks/atac\_ref\_peaks/AF30\_Flu\_ATACSeq\_1\_2-308168\_S11\_L001\_I\_peaks.narrowPeak  
peaks/atac\_ref\_peaks/AF24\_Flu\_ATACSeq\_1\_2-308162\_S5\_L001\_I\_peaks.narrowPeak  
peaks/atac\_hprc\_peaks/EU29\_Flu\_ATACSeq\_1\_2-268563\_S10\_L001\_I\_peaks.narrowPeak  
peaks/atac\_hprc\_peaks/EU09\_Flu\_ATACSeq\_1\_2-259471\_S11\_L001\_I\_peaks.narrowPeak  
peaks/atac\_hprc\_peaks/EU13\_Flu\_ATACSeq\_1\_2-259477\_S1\_L002\_I\_peaks.narrowPeak  
peaks/atac\_hprc\_peaks/EU05\_Flu\_ATACSeq\_1\_2-259464\_S4\_L001\_I\_peaks.narrowPeak  
peaks/atac\_hprc\_peaks/AF10\_Flu\_ATACSeq\_1\_2-259491\_S15\_L002\_I\_peaks.narrowPeak  
peaks/atac\_hprc\_peaks/EU19\_Flu\_ATACSeq\_1\_2-259485\_S9\_L002\_I\_peaks.narrowPeak

peaks/atac\_hprc\_peaks/AF22\_Flu\_ATACSeq\_1\_2-308160\_S3\_L001\_I\_peaks.narrowPeak  
peaks/atac\_hprc\_peaks/AF14\_Flu\_ATACSeq\_1\_2-268556\_S3\_L001\_I\_peaks.narrowPeak  
peaks/atac\_hprc\_peaks/EU33\_Flu\_ATACSeq\_1\_2-308170\_S13\_L001\_I\_peaks.narrowPeak  
peaks/atac\_hprc\_peaks/EU37\_Flu\_ATACSeq\_1\_2-308172\_S15\_L001\_I\_peaks.narrowPeak  
peaks/atac\_hprc\_peaks/AF18\_Flu\_ATACSeq\_1\_2-268567\_S14\_L001\_I\_peaks.narrowPeak  
peaks/atac\_hprc\_peaks/EU47\_Flu\_ATACSeq\_1\_2-308183\_S10\_L002\_I\_peaks.narrowPeak  
peaks/atac\_hprc\_peaks/EU27\_Flu\_ATACSeq\_1\_2-268561\_S8\_L001\_I\_peaks.narrowPeak  
peaks/atac\_hprc\_peaks/AF26\_Flu\_ATACSeq\_1\_2-308164\_S7\_L001\_I\_peaks.narrowPeak  
peaks/atac\_hprc\_peaks/EU43\_Flu\_ATACSeq\_1\_2-308181\_S8\_L002\_I\_peaks.narrowPeak  
peaks/atac\_hprc\_peaks/EU21\_Flu\_ATACSeq\_1\_2-259488\_S12\_L002\_I\_peaks.narrowPeak  
peaks/atac\_hprc\_peaks/AF34\_Flu\_ATACSeq\_1\_2-308174\_S17\_L001\_I\_peaks.narrowPeak  
peaks/atac\_hprc\_peaks/AF28\_Flu\_ATACSeq\_1\_2-308166\_S9\_L001\_I\_peaks.narrowPeak  
peaks/atac\_hprc\_peaks/EU07\_Flu\_ATACSeq\_1\_2-259468\_S8\_L001\_I\_peaks.narrowPeak  
peaks/atac\_hprc\_peaks/EU41\_Flu\_ATACSeq\_1\_2-308179\_S6\_L002\_I\_peaks.narrowPeak  
peaks/atac\_hprc\_peaks/EU03\_Flu\_ATACSeq\_1\_2-259462\_S2\_L001\_I\_peaks.narrowPeak  
peaks/atac\_hprc\_peaks/EU17\_Flu\_ATACSeq\_1\_2-308175\_S2\_L002\_I\_peaks.narrowPeak  
peaks/atac\_hprc\_peaks/AF16\_Flu\_ATACSeq\_1\_2-268565\_S12\_L001\_I\_peaks.narrowPeak  
peaks/atac\_hprc\_peaks/AF20\_Flu\_ATACSeq\_1\_2-308158\_S1\_L001\_I\_peaks.narrowPeak  
peaks/atac\_hprc\_peaks/EU25\_Flu\_ATACSeq\_1\_2-268559\_S6\_L001\_I\_peaks.narrowPeak  
peaks/atac\_hprc\_peaks/EU15\_Flu\_ATACSeq\_1\_2-259481\_S5\_L002\_I\_peaks.narrowPeak  
peaks/atac\_hprc\_peaks/EU39\_Flu\_ATACSeq\_1\_2-308177\_S4\_L002\_I\_peaks.narrowPeak  
peaks/atac\_hprc\_peaks/AF04\_Flu\_ATACSeq\_1\_2-259466\_S6\_L001\_I\_peaks.narrowPeak  
peaks/atac\_hprc\_peaks/AF36\_Flu\_ATACSeq\_1\_2-308185\_S12\_L002\_I\_peaks.narrowPeak  
peaks/atac\_hprc\_peaks/AF08\_Flu\_ATACSeq\_1\_2-259483\_S7\_L002\_I\_peaks.narrowPeak  
peaks/atac\_hprc\_peaks/AF12\_Flu\_ATACSeq\_1\_2-268554\_S1\_L001\_I\_peaks.narrowPeak  
peaks/atac\_hprc\_peaks/AF06\_Flu\_ATACSeq\_1\_2-259479\_S3\_L002\_I\_peaks.narrowPeak  
peaks/atac\_hprc\_peaks/AF38\_Flu\_ATACSeq\_1\_2-308187\_S14\_L002\_I\_peaks.narrowPeak  
peaks/atac\_hprc\_peaks/AF30\_Flu\_ATACSeq\_1\_2-308168\_S11\_L001\_I\_peaks.narrowPeak  
peaks/atac\_hprc\_peaks/AF24\_Flu\_ATACSeq\_1\_2-308162\_S5\_L001\_I\_peaks.narrowPeak  
peaks/h3k4me1\_hprc\_peaks/AF28\_Flu\_2-669592\_ChIPmentation-H3K4me1\_A00266\_0289\_2\_S9\_L002\_I\_peaks.narrowPeak  
peaks/h3k4me1\_hprc\_peaks/AF30\_Flu\_2-674830\_ChIPmentation-H3K4me1\_A00266\_0301\_2\_S7\_L002\_I\_peaks.narrowPeak  
peaks/h3k4me1\_hprc\_peaks/EU27\_Flu\_2-674815\_ChIPmentation-H3K4me1A00266\_0301\_1\_S16\_L001\_I\_peaks.narrowPeak  
peaks/h3k4me1\_hprc\_peaks/EU05\_Flu\_2-674801\_ChIPmentation-H3K4me1A00266\_0301\_1\_S2\_L001\_I\_peaks.narrowPeak  
peaks/h3k4me1\_hprc\_peaks/AF18\_Flu\_2-674803\_ChIPmentation-H3K4me1\_A00266\_0301\_1\_S4\_L001\_I\_peaks.narrowPeak  
peaks/h3k4me1\_hprc\_peaks/EU47\_Flu\_2-674834\_ChIPmentation-H3K4me1A00266\_0301\_2\_S11\_L002\_I\_peaks.narrowPeak  
peaks/h3k4me1\_hprc\_peaks/AF34\_Flu\_2-669596\_ChIPmentation-H3K4me1\_A00266\_0289\_2\_S13\_L002\_I\_peaks.narrowPeak  
peaks/h3k4me1\_hprc\_peaks/EU09\_Flu\_2-669582\_ChIPmentation-H3K4me1A00266\_0289\_1\_S23\_L001\_I\_peaks.narrowPeak  
peaks/h3k4me1\_hprc\_peaks/AF20\_Flu\_2-669580\_ChIPmentation-H3K4me1\_A00266\_0289\_1\_S21\_L001\_I\_peaks.narrowPeak  
peaks/h3k4me1\_hprc\_peaks/EU39\_Flu\_2-669598\_ChIPmentation-H3K4me1A00266\_0289\_2\_S15\_L002\_I\_peaks.narrowPeak  
peaks/h3k4me1\_hprc\_peaks/EU03\_Flu\_2-674750\_ChIPmentation-H3K4me1A00266\_0301\_1\_S1\_L001\_I\_peaks.narrowPeak  
peaks/h3k4me1\_hprc\_peaks/EU15\_Flu\_2-669589\_ChIPmentation-H3K4me1A00266\_0289\_2\_S6\_L002\_I\_peaks.narrowPeak  
peaks/h3k4me1\_hprc\_peaks/AF12\_Flu\_2-669587\_ChIPmentation-H3K4me1\_A00266\_0289\_2\_S4\_L002\_I\_peaks.narrowPeak  
peaks/h3k4me1\_hprc\_peaks/EU25\_Flu\_2-669590\_ChIPmentation-H3K4me1A00266\_0289\_2\_S7\_L002\_I\_peaks.narrowPeak  
peaks/h3k4me1\_hprc\_peaks/AF24\_Flu\_2-674804\_ChIPmentation-H3K4me1\_A00266\_0301\_1\_S5\_L001\_I\_peaks.narrowPeak  
peaks/h3k4me1\_hprc\_peaks/AF36\_Flu\_2-669593\_ChIPmentation-H3K4me1\_A00266\_0289\_2\_S10\_L002\_I\_peaks.narrowPeak  
peaks/h3k4me1\_hprc\_peaks/AF04\_Flu\_2-674805\_ChIPmentation-H3K4me1\_A00266\_0301\_1\_S6\_L001\_I\_peaks.narrowPeak  
peaks/h3k4me1\_hprc\_peaks/EU13\_Flu\_2-669595\_ChIPmentation-H3K4me1A00266\_0289\_2\_S12\_L002\_I\_peaks.narrowPeak  
peaks/h3k4me1\_hprc\_peaks/EU07\_Flu\_2-674802\_ChIPmentation-H3K4me1A00266\_0301\_1\_S3\_L001\_I\_peaks.narrowPeak  
peaks/h3k4me1\_hprc\_peaks/AF38\_Flu\_2-674837\_ChIPmentation-H3K4me1\_A00266\_0301\_2\_S14\_L002\_I\_peaks.narrowPeak  
peaks/h3k4me1\_hprc\_peaks/AF06\_Flu\_2-674806\_ChIPmentation-H3K4me1\_A00266\_0301\_1\_S7\_L001\_I\_peaks.narrowPeak  
peaks/h3k4me1\_hprc\_peaks/AF22\_Flu\_2-674827\_ChIPmentation-H3K4me1\_A00266\_0301\_2\_S4\_L002\_I\_peaks.narrowPeak  
peaks/h3k4me1\_hprc\_peaks/EU41\_Flu\_2-674832\_ChIPmentation-H3K4me1A00266\_0301\_2\_S9\_L002\_I\_peaks.narrowPeak  
peaks/h3k4me1\_hprc\_peaks/EU29\_Flu\_2-674821\_ChIPmentation-H3K4me1A00266\_0301\_1\_S22\_L001\_I\_peaks.narrowPeak  
peaks/h3k4me1\_hprc\_peaks/AF26\_Flu\_2-669591\_ChIPmentation-H3K4me1\_A00266\_0289\_2\_S8\_L002\_I\_peaks.narrowPeak  
peaks/h3k4me1\_hprc\_peaks/EU19\_Flu\_2-669585\_ChIPmentation-H3K4me1A00266\_0289\_2\_S2\_L002\_I\_peaks.narrowPeak  
peaks/h3k4me1\_hprc\_peaks/AF16\_Flu\_2-669654\_ChIPmentation-H3K4me1\_A00266\_0289\_2\_S21\_L002\_I\_peaks.narrowPeak  
peaks/h3k4me1\_hprc\_peaks/AF08\_Flu\_2-669652\_ChIPmentation-H3K4me1\_A00266\_0289\_2\_S19\_L002\_I\_peaks.narrowPeak  
peaks/h3k4me1\_hprc\_peaks/EU33\_Flu\_2-674820\_ChIPmentation-H3K4me1A00266\_0301\_1\_S21\_L001\_I\_peaks.narrowPeak  
peaks/h3k4me1\_hprc\_peaks/EU21\_Flu\_2-669653\_ChIPmentation-H3K4me1A00266\_0289\_2\_S20\_L002\_I\_peaks.narrowPeak  
peaks/atac\_overlaps/AF10\_Flu\_ATACSeq\_1\_2-259491\_S15\_L002\_I\_peaks.narrowPeak\_intersect.bed  
peaks/atac\_overlaps/EU17\_Flu\_ATACSeq\_1\_2-308175\_S2\_L002\_I\_peaks.narrowPeak\_ref-only.bed  
peaks/atac\_overlaps/EU07\_Flu\_ATACSeq\_1\_2-259468\_S8\_L001\_I\_peaks.narrowPeak\_ref-only.bed





peaks/atac\_overlaps/AF20\_Flu\_ATACSeq\_1\_2-308158\_S1\_L001\_I\_peaks.narrowPeak\_ref-only.bed  
peaks/atac\_overlaps/AF12\_Flu\_ATACSeq\_1\_2-268554\_S1\_L001\_I\_peaks.narrowPeak\_intersect.bed  
peaks/atac\_overlaps/AF14\_Flu\_ATACSeq\_1\_2-268556\_S3\_L001\_I\_peaks.narrowPeak\_ref-only.bed  
peaks/atac\_overlaps/AF26\_Flu\_ATACSeq\_1\_2-308164\_S7\_L001\_I\_peaks.narrowPeak\_intersect.bed  
peaks/atac\_overlaps/EU27\_Flu\_ATACSeq\_1\_2-268561\_S8\_L001\_I\_peaks.narrowPeak\_intersect.bed  
peaks/atac\_overlaps/EU29\_Flu\_ATACSeq\_1\_2-268563\_S10\_L001\_I\_peaks.narrowPeak\_pers-only.bed  
peaks/atac\_overlaps/AF18\_Flu\_ATACSeq\_1\_2-268567\_S14\_L001\_I\_peaks.narrowPeak\_pers-only.bed  
peaks/atac\_overlaps/AF16\_Flu\_ATACSeq\_1\_2-268565\_S12\_L001\_I\_peaks.narrowPeak\_ref-only.bed  
peaks/atac\_overlaps/EU43\_Flu\_ATACSeq\_1\_2-308181\_S8\_L002\_I\_peaks.narrowPeak\_pers-only.bed  
peaks/atac\_overlaps/AF06\_Flu\_ATACSeq\_1\_2-259479\_S3\_L002\_I\_peaks.narrowPeak\_ref-only.bed  
peaks/atac\_overlaps/AF08\_Flu\_ATACSeq\_1\_2-259483\_S7\_L002\_I\_peaks.narrowPeak\_pers-only.bed  
peaks/atac\_overlaps/AF06\_Flu\_ATACSeq\_1\_2-259479\_S3\_L002\_I\_peaks.narrowPeak\_pers-only.bed  
peaks/atac\_overlaps/AF30\_Flu\_ATACSeq\_1\_2-308168\_S11\_L001\_I\_peaks.narrowPeak\_pers-only.bed  
peaks/atac\_overlaps/EU37\_Flu\_ATACSeq\_1\_2-308172\_S15\_L001\_I\_peaks.narrowPeak\_intersect.bed  
peaks/atac\_overlaps/EU27\_Flu\_ATACSeq\_1\_2-268561\_S8\_L001\_I\_peaks.narrowPeak\_ref-only.bed  
peaks/atac\_overlaps/AF16\_Flu\_ATACSeq\_1\_2-268565\_S12\_L001\_I\_peaks.narrowPeak\_intersect.bed  
peaks/atac\_overlaps/AF04\_Flu\_ATACSeq\_1\_2-259466\_S6\_L001\_I\_peaks.narrowPeak\_ref-only.bed  
peaks/atac\_overlaps/EU41\_Flu\_ATACSeq\_1\_2-308179\_S6\_L002\_I\_peaks.narrowPeak\_intersect.bed  
peaks/atac\_overlaps/AF24\_Flu\_ATACSeq\_1\_2-308162\_S5\_L001\_I\_peaks.narrowPeak\_pers-only.bed  
peaks/atac\_overlaps/EU21\_Flu\_ATACSeq\_1\_2-259488\_S12\_L002\_I\_peaks.narrowPeak\_pers-only.bed  
peaks/atac\_overlaps/EU05\_Flu\_ATACSeq\_1\_2-259464\_S4\_L001\_I\_peaks.narrowPeak\_pers-only.bed  
peaks/atac\_overlaps/EU39\_Flu\_ATACSeq\_1\_2-308177\_S4\_L002\_I\_peaks.narrowPeak\_ref-only.bed  
peaks/atac\_overlaps/AF12\_Flu\_ATACSeq\_1\_2-268554\_S1\_L001\_I\_peaks.narrowPeak\_ref-only.bed  
peaks/h3k4me1\_ref\_peaks/AF28\_Flu\_2-669592\_ChIPmentation-H3K4me1\_A00266\_0289\_2\_S9\_L002\_I\_peaks.narrowPeak  
peaks/h3k4me1\_ref\_peaks/AF30\_Flu\_2-674830\_ChIPmentation-H3K4me1\_A00266\_0301\_2\_S7\_L002\_I\_peaks.narrowPeak  
peaks/h3k4me1\_ref\_peaks/EU27\_Flu\_2-674815\_ChIPmentation-H3K4me1A00266\_0301\_1\_S16\_L001\_I\_peaks.narrowPeak  
peaks/h3k4me1\_ref\_peaks/EU05\_Flu\_2-674801\_ChIPmentation-H3K4me1A00266\_0301\_1\_S2\_L001\_I\_peaks.narrowPeak  
peaks/h3k4me1\_ref\_peaks/AF18\_Flu\_2-674803\_ChIPmentation-H3K4me1\_A00266\_0301\_1\_S4\_L001\_I\_peaks.narrowPeak  
peaks/h3k4me1\_ref\_peaks/EU47\_Flu\_2-674834\_ChIPmentation-H3K4me1A00266\_0301\_2\_S11\_L002\_I\_peaks.narrowPeak  
peaks/h3k4me1\_ref\_peaks/AF34\_Flu\_2-669596\_ChIPmentation-H3K4me1\_A00266\_0289\_2\_S13\_L002\_I\_peaks.narrowPeak  
peaks/h3k4me1\_ref\_peaks/EU09\_Flu\_2-669582\_ChIPmentation-H3K4me1A00266\_0289\_1\_S23\_L001\_I\_peaks.narrowPeak  
peaks/h3k4me1\_ref\_peaks/AF20\_Flu\_2-669580\_ChIPmentation-H3K4me1\_A00266\_0289\_1\_S21\_L001\_I\_peaks.narrowPeak  
peaks/h3k4me1\_ref\_peaks/EU39\_Flu\_2-669598\_ChIPmentation-H3K4me1A00266\_0289\_2\_S15\_L002\_I\_peaks.narrowPeak  
peaks/h3k4me1\_ref\_peaks/EU03\_Flu\_2-674750\_ChIPmentation-H3K4me1A00266\_0301\_1\_S1\_L001\_I\_peaks.narrowPeak  
peaks/h3k4me1\_ref\_peaks/EU15\_Flu\_2-669589\_ChIPmentation-H3K4me1A00266\_0289\_2\_S6\_L002\_I\_peaks.narrowPeak  
peaks/h3k4me1\_ref\_peaks/AF12\_Flu\_2-669587\_ChIPmentation-H3K4me1\_A00266\_0289\_2\_S4\_L002\_I\_peaks.narrowPeak  
peaks/h3k4me1\_ref\_peaks/EU25\_Flu\_2-669590\_ChIPmentation-H3K4me1A00266\_0289\_2\_S7\_L002\_I\_peaks.narrowPeak  
peaks/h3k4me1\_ref\_peaks/AF24\_Flu\_2-674804\_ChIPmentation-H3K4me1\_A00266\_0301\_1\_S5\_L001\_I\_peaks.narrowPeak  
peaks/h3k4me1\_ref\_peaks/AF36\_Flu\_2-669593\_ChIPmentation-H3K4me1\_A00266\_0289\_2\_S10\_L002\_I\_peaks.narrowPeak  
peaks/h3k4me1\_ref\_peaks/AF04\_Flu\_2-674805\_ChIPmentation-H3K4me1\_A00266\_0301\_1\_S6\_L001\_I\_peaks.narrowPeak  
peaks/h3k4me1\_ref\_peaks/EU13\_Flu\_2-669595\_ChIPmentation-H3K4me1A00266\_0289\_2\_S12\_L002\_I\_peaks.narrowPeak  
peaks/h3k4me1\_ref\_peaks/EU07\_Flu\_2-674802\_ChIPmentation-H3K4me1A00266\_0301\_1\_S3\_L001\_I\_peaks.narrowPeak  
peaks/h3k4me1\_ref\_peaks/AF38\_Flu\_2-674837\_ChIPmentation-H3K4me1\_A00266\_0301\_2\_S14\_L002\_I\_peaks.narrowPeak  
peaks/h3k4me1\_ref\_peaks/AF06\_Flu\_2-674806\_ChIPmentation-H3K4me1\_A00266\_0301\_1\_S7\_L001\_I\_peaks.narrowPeak  
peaks/h3k4me1\_ref\_peaks/AF22\_Flu\_2-674827\_ChIPmentation-H3K4me1\_A00266\_0301\_2\_S4\_L002\_I\_peaks.narrowPeak  
peaks/h3k4me1\_ref\_peaks/EU41\_Flu\_2-674832\_ChIPmentation-H3K4me1A00266\_0301\_2\_S9\_L002\_I\_peaks.narrowPeak  
peaks/h3k4me1\_ref\_peaks/EU29\_Flu\_2-674821\_ChIPmentation-H3K4me1A00266\_0301\_1\_S22\_L001\_I\_peaks.narrowPeak  
peaks/h3k4me1\_ref\_peaks/AF26\_Flu\_2-669591\_ChIPmentation-H3K4me1\_A00266\_0289\_2\_S8\_L002\_I\_peaks.narrowPeak  
peaks/h3k4me1\_ref\_peaks/EU19\_Flu\_2-669585\_ChIPmentation-H3K4me1A00266\_0289\_2\_S2\_L002\_I\_peaks.narrowPeak  
peaks/h3k4me1\_ref\_peaks/AF16\_Flu\_2-669654\_ChIPmentation-H3K4me1\_A00266\_0289\_2\_S21\_L002\_I\_peaks.narrowPeak  
peaks/h3k4me1\_ref\_peaks/AF08\_Flu\_2-669652\_ChIPmentation-H3K4me1\_A00266\_0289\_2\_S19\_L002\_I\_peaks.narrowPeak  
peaks/h3k4me1\_ref\_peaks/EU33\_Flu\_2-674820\_ChIPmentation-H3K4me1A00266\_0301\_1\_S21\_L001\_I\_peaks.narrowPeak  
peaks/h3k4me1\_ref\_peaks/EU21\_Flu\_2-669653\_ChIPmentation-H3K4me1A00266\_0289\_2\_S20\_L002\_I\_peaks.narrowPeak  
indel\_snarls/  
indel\_snarls/H3K4me1\_indel\_matched/  
indel\_snarls/H3K27ac\_indel\_matched/  
indel\_snarls/ATACseq\_indel\_matched/  
indel\_snarls/ATACseq\_indel\_matched/0000.vcf.gz  
indel\_snarls/ATACseq\_indel\_matched/0001.vcf.gz.tbi  
indel\_snarls/ATACseq\_indel\_matched/sites.txt  
indel\_snarls/ATACseq\_indel\_matched/0000.vcf.gz.tbi  
indel\_snarls/ATACseq\_indel\_matched/0001.vcf.gz  
indel\_snarls/ATACseq\_indel\_matched/README.txt  
indel\_snarls/H3K27ac\_indel\_matched/0000.vcf.gz  
indel\_snarls/H3K27ac\_indel\_matched/0001.vcf.gz.tbi  
indel\_snarls/H3K27ac\_indel\_matched/sites.txt  
indel\_snarls/H3K27ac\_indel\_matched/0000.vcf.gz.tbi  
indel\_snarls/H3K27ac\_indel\_matched/0001.vcf.gz  
indel\_snarls/H3K27ac\_indel\_matched/README.txt  
indel\_snarls/H3K4me1\_indel\_matched/0000.vcf.gz  
indel\_snarls/H3K4me1\_indel\_matched/0001.vcf.gz.tbi  
indel\_snarls/H3K4me1\_indel\_matched/sites.txt  
indel\_snarls/H3K4me1\_indel\_matched/0000.vcf.gz.tbi  
indel\_snarls/H3K4me1\_indel\_matched/0001.vcf.gz  
indel\_snarls/H3K4me1\_indel\_matched/README.txt  
align.nf



call\_peaks.nf  
figures.R

Genome browser session  
(e.g. [UCSC](#))

No longer applicable

## Methodology

Replicates

1 per sample

Sequencing depth

Sequencing depth H3K27ac: Average 257 million reads per sample  
H3Kme1: Average 288 million reads per sample  
ATAC-seq; Average of 279 million reads per sample

Antibodies

H3K27ac (Diagenode antibody, cat # C15410196) and H3K4me1 (Cell Signaling antibody, cat # CST5326). Sequencing data is produced by another study (<https://www.biorxiv.org/content/10.1101/2021.09.29.462206v2>)

Peak calling parameters

We aligned H3K4me1 and H3K27ac binding sequences obtained from monocyte-derived macrophages from 30 individuals (Groza et al., 2022) using vg map (Garrison et al., 2018) to the hg38 reference genome graph and to the HPRC genome graph. Then, we called peaks using Graph Peak Caller v1.2.3 (Grytten et al., 2019) on both sets of alignments for each of the 30 H3K4me1 and H3K27ac samples.

Data quality

5 million cells per sample, 100 bp paired-end, 150-500bp fragments

Software

vg map and Graph Peak Caller v1.2.3

## Flow Cytometry

### Plots

Confirm that:

- The axis labels state the marker and fluorochrome used (e.g. CD4-FITC).
- The axis scales are clearly visible. Include numbers along axes only for bottom left plot of group (a 'group' is an analysis of identical markers).
- All plots are contour plots with outliers or pseudocolor plots.
- A numerical value for number of cells or percentage (with statistics) is provided.

### Methodology

Sample preparation

*Describe the sample preparation, detailing the biological source of the cells and any tissue processing steps used.*

Instrument

*Identify the instrument used for data collection, specifying make and model number.*

Software

*Describe the software used to collect and analyze the flow cytometry data. For custom code that has been deposited into a community repository, provide accession details.*

Cell population abundance

*Describe the abundance of the relevant cell populations within post-sort fractions, providing details on the purity of the samples and how it was determined.*

Gating strategy

*Describe the gating strategy used for all relevant experiments, specifying the preliminary FSC/SSC gates of the starting cell population, indicating where boundaries between "positive" and "negative" staining cell populations are defined.*

- Tick this box to confirm that a figure exemplifying the gating strategy is provided in the Supplementary Information.

## Magnetic resonance imaging

### Experimental design

Design type

*Indicate task or resting state; event-related or block design.*

Design specifications

*Specify the number of blocks, trials or experimental units per session and/or subject, and specify the length of each trial or block (if trials are blocked) and interval between trials.*

Behavioral performance measures

*State number and/or type of variables recorded (e.g. correct button press, response time) and what statistics were used to establish that the subjects were performing the task as expected (e.g. mean, range, and/or standard deviation across subjects).*

## Acquisition

Imaging type(s)

Field strength

Sequence & imaging parameters

Area of acquisition

Diffusion MRI  Used  Not used

## Preprocessing

Preprocessing software

Normalization

Normalization template

Noise and artifact removal

Volume censoring

## Statistical modeling & inference

Model type and settings

Effect(s) tested

Specify type of analysis:  Whole brain  ROI-based  Both

Statistic type for inference (See [Eklund et al. 2016](#))

Correction

## Models & analysis

|                          |                                                                       |
|--------------------------|-----------------------------------------------------------------------|
| n/a                      | Involvement in the study                                              |
| <input type="checkbox"/> | <input type="checkbox"/> Functional and/or effective connectivity     |
| <input type="checkbox"/> | <input type="checkbox"/> Graph analysis                               |
| <input type="checkbox"/> | <input type="checkbox"/> Multivariate modeling or predictive analysis |

Functional and/or effective connectivity

Graph analysis

Multivariate modeling and predictive analysis
